# Supplementary material for: The Role of Neutrophil-to-Lymphocyte Ratio in Risk Stratification and Prognostication of COVID-19: A Systematic Review and Meta-Analysis
Source: MDPI journal article supplement (doi:10.3390/vaccines10081233), 2022-08-01

*Systematic Review and Meta-Analysis*

## Supplementary Files : The role of Neutrophil-to-Lymphocyte ratio in Risk Stratification and Prognostication of COVID-19

Ashwaghosha Parthasarathi<sup>1</sup>, Sunag Padukudru<sup>2</sup>, Sumalata Arunachal<sup>3</sup>, Chetak Kadabasal Basavaraj<sup>3</sup>, Mamidipudi Thirumala Krishna<sup>4</sup>, Koustav Ganguly<sup>5</sup>, Swapna Upadhyay<sup>5\*</sup>, Padukudru Anand Mahesh<sup>3\*</sup>

1. Allergy, Asthma, and Chest Centre, Krishnamurthypuram, Mysore, Karnataka, India
2. Yenepoya Medical College, Yenepoya University, Mangalore, Karnataka, India
3. Department of Respiratory Medicine, JSS Medical College, JSSAHER, Mysore, Karnataka, India
4. University Hospitals Birmingham NHS Foundation Trust; Institute of Immunology Immunotherapy, University of Birmingham, UK
5. Unit of Integrative Toxicology, Institute of Environmental Medicine (IMM), Karolinska Institutet, 17177 Stockholm, Sweden

\* equal contribution and corresponding authors

\* Correspondence: PAM : [mahesh1971in@yahoo.com](mailto:mahesh1971in@yahoo.com); SU: [swapna.upadhyay@ki.se](mailto:swapna.upadhyay@ki.se)

---

## List of Supplementary Files

Table S1. PRISMA checklist

Table S2. Search strategy for peer-reviewed databases

Table S3. The characteristics of included studies comparing severe and non-severe COVID-19 patients

Table S4. The characteristics of included studies comparing survivors and non-survivors of COVID-19

Table S5. Risk of bias assessment of all included studies using the Newcastle-Ottawa Scale (NOS)

Figure S1 A: Forest plot of studies comparing severe disease with non-severe disease, stratified by severity criteria

Figure S1 B: Forest plot of studies comparing severe disease with non-severe disease, stratified by region

Figure S2: Forest plot of studies comparing non-survivors with survivors, stratified by region

Figure S3 A: Forest plot of the odds of NLR for predicting disease severity in patients with COVID-19.

Figure S3 B: Forest plot of odds of NLR for predicting disease mortality in patients with COVID-19.

Figure S4 A: Forest plot showing sensitivity of NLR for predicting disease severity in patients with COVID-19.

Figure S4 B: Forest plot showing specificity of NLR for predicting disease severity in patients with COVID-19.

Figure S5: Forest plot showing diagnostic odds ratio (DOR) of NLR for predicting disease severity in patients with COVID-19.

Figure S6: Forest plot showing sensitivity and specificity of NLR for predicting disease Mortality in patients with COVID-19.

Figure S7: Forest plot showing sensitivity and specificity of NLR for predicting disease Mortality in patients with COVID-19.

---

**Figure S8: Forest Plot using the random-effects model showing the association between NLR value on admission and all-cause mortality risk.**

**Figure S9: Bubble plot for meta-regression in studies with severity outcome.**

**Figure S10: Bubble plot for meta-regression in studies with mortality outcome**

**Figure S11: Forest plot of studies comparing severe disease with non-severe disease stratified by study design**

**Figure S12 : Forest plot of studies comparing non-survivors with survivors, stratified by study design**

**Table S1: Prisma Checklist**

| Section and Topic       | Item # | Checklist item                                                                                                                                                                                                                                                                                       | Location where item is reported |
|-------------------------|--------|------------------------------------------------------------------------------------------------------------------------------------------------------------------------------------------------------------------------------------------------------------------------------------------------------|---------------------------------|
| <b>TITLE</b>            |        |                                                                                                                                                                                                                                                                                                      |                                 |
| Title                   | 1      | Identify the report as a systematic review.                                                                                                                                                                                                                                                          | Page 1                          |
| <b>ABSTRACT</b>         |        |                                                                                                                                                                                                                                                                                                      |                                 |
| Abstract                | 2      | See the PRISMA 2020 for Abstracts checklist.                                                                                                                                                                                                                                                         |                                 |
| <b>INTRODUCTION</b>     |        |                                                                                                                                                                                                                                                                                                      |                                 |
| Rationale               | 3      | Describe the rationale for the review in the context of existing knowledge.                                                                                                                                                                                                                          | Page 2                          |
| Objectives              | 4      | Provide an explicit statement of the objective(s) or question(s) the review addresses.                                                                                                                                                                                                               | Page 2                          |
| <b>METHODS</b>          |        |                                                                                                                                                                                                                                                                                                      |                                 |
| Eligibility criteria    | 5      | Specify the inclusion and exclusion criteria for the review and how studies were grouped for the syntheses.                                                                                                                                                                                          | Page 3                          |
| Information sources     | 6      | Specify all databases, registers, websites, organisations, reference lists and other sources searched or consulted to identify studies.<br>Specify the date when each source was last searched or consulted.                                                                                         | Page 3                          |
| Search strategy         | 7      | Present the full search strategies for all databases, registers and websites, including any filters and limits used.                                                                                                                                                                                 | Page 3                          |
| Selection process       | 8      | Specify the methods used to decide whether a study met the inclusion criteria of the review, including how many reviewers screened each record and each report retrieved, whether they worked independently, and if applicable, details of automation tools used in the process.                     | Page 3,4                        |
| Data collection process | 9      | Specify the methods used to collect data from reports, including how many reviewers collected data from each report, whether they worked independently, any processes for obtaining or confirming data from study investigators, and if applicable, details of automation tools used in the process. | Page 3,4                        |

| Section and Topic             | Item # | Checklist item                                                                                                                                                                                                                                                                | Location where item is reported |
|-------------------------------|--------|-------------------------------------------------------------------------------------------------------------------------------------------------------------------------------------------------------------------------------------------------------------------------------|---------------------------------|
| Data items                    | 10a    | List and define all outcomes for which data were sought. Specify whether all results that were compatible with each outcome domain in each study were sought (e.g. for all measures, time points, analyses), and if not, the methods used to decide which results to collect. | Page 3,4                        |
|                               | 10b    | List and define all other variables for which data were sought (e.g. participant and intervention characteristics, funding sources). Describe any assumptions made about any missing or unclear information.                                                                  | -                               |
| Study risk of bias assessment | 11     | Specify the methods used to assess risk of bias in the included studies, including details of the tool(s) used, how many reviewers assessed each study and whether they worked independently, and if applicable, details of automation tools used in the process.             | Page 4                          |
| Effect measures               | 12     | Specify for each outcome the effect measure(s) (e.g. risk ratio, mean difference) used in the synthesis or presentation of results.                                                                                                                                           | Page 4,5                        |
| Synthesis methods             | 13a    | Describe the processes used to decide which studies were eligible for each synthesis (e.g. tabulating the study intervention characteristics and comparing against the planned groups for each synthesis (item #5)).                                                          | Figure 1                        |
|                               | 13b    | Describe any methods required to prepare the data for presentation or synthesis, such as handling of missing summary statistics, or data conversions.                                                                                                                         | -                               |
|                               | 13c    | Describe any methods used to tabulate or visually display results of individual studies and syntheses.                                                                                                                                                                        | Page 4                          |
|                               | 13d    | Describe any methods used to synthesize results and provide a rationale for the choice(s). If meta-analysis was performed, describe the model(s), method(s) to identify the presence and extent of statistical heterogeneity, and software package(s) used.                   | Page 4,5                        |
|                               | 13e    | Describe any methods used to explore possible causes of heterogeneity among study results (e.g. subgroup analysis, meta-regression).                                                                                                                                          | Page 5                          |
|                               | 13f    | Describe any sensitivity analyses conducted to assess robustness of the synthesized results.                                                                                                                                                                                  | -                               |
| Reporting bias assessment     | 14     | Describe any methods used to assess risk of bias due to missing results in a synthesis (arising from reporting biases).                                                                                                                                                       | -                               |
| Certainty assessment          | 15     | Describe any methods used to assess certainty (or confidence) in the body of evidence for an outcome.                                                                                                                                                                         | -                               |
| <b>RESULTS</b>                |        |                                                                                                                                                                                                                                                                               |                                 |

| Section and Topic             | Item # | Checklist item                                                                                                                                                                                                                                                                       | Location where item is reported |
|-------------------------------|--------|--------------------------------------------------------------------------------------------------------------------------------------------------------------------------------------------------------------------------------------------------------------------------------------|---------------------------------|
| Study selection               | 16a    | Describe the results of the search and selection process, from the number of records identified in the search to the number of studies included in the review, ideally using a flow diagram.                                                                                         | Page 5                          |
|                               | 16b    | Cite studies that might appear to meet the inclusion criteria, but which were excluded, and explain why they were excluded.                                                                                                                                                          | Page 5                          |
| Study characteristics         | 17     | Cite each included study and present its characteristics.                                                                                                                                                                                                                            | Table 1                         |
| Risk of bias in studies       | 18     | Present assessments of risk of bias for each included study.                                                                                                                                                                                                                         | -                               |
| Results of individual studies | 19     | For all outcomes, present, for each study: (a) summary statistics for each group (where appropriate) and (b) an effect estimate and its precision (e.g. confidence/credible interval), ideally using structured tables or plots.                                                     | Table number                    |
| Results of syntheses          | 20a    | For each synthesis, briefly summarise the characteristics and risk of bias among contributing studies.                                                                                                                                                                               | -                               |
|                               | 20b    | Present results of all statistical syntheses conducted. If meta-analysis was done, present for each the summary estimate and its precision (e.g. confidence/credible interval) and measures of statistical heterogeneity. If comparing groups, describe the direction of the effect. | Page 6-8                        |
|                               | 20c    | Present results of all investigations of possible causes of heterogeneity among study results.                                                                                                                                                                                       | -                               |
|                               | 20d    | Present results of all sensitivity analyses conducted to assess the robustness of the synthesized results.                                                                                                                                                                           | -                               |
| Reporting biases              | 21     | Present assessments of risk of bias due to missing results (arising from reporting biases) for each synthesis assessed.                                                                                                                                                              | -                               |
| Certainty of evidence         | 22     | Present assessments of certainty (or confidence) in the body of evidence for each outcome assessed.                                                                                                                                                                                  | -                               |
| <b>DISCUSSION</b>             |        |                                                                                                                                                                                                                                                                                      |                                 |
| Discussion                    | 23a    | Provide a general interpretation of the results in the context of other evidence.                                                                                                                                                                                                    | Page 8-11                       |

| Section and Topic                              | Item # | Checklist item                                                                                                                                                                                                                             | Location where item is reported |
|------------------------------------------------|--------|--------------------------------------------------------------------------------------------------------------------------------------------------------------------------------------------------------------------------------------------|---------------------------------|
|                                                | 23b    | Discuss any limitations of the evidence included in the review.                                                                                                                                                                            | Page 11                         |
|                                                | 23c    | Discuss any limitations of the review processes used.                                                                                                                                                                                      | -                               |
|                                                | 23d    | Discuss implications of the results for practice, policy, and future research.                                                                                                                                                             | -                               |
| <b>OTHER INFORMATION</b>                       |        |                                                                                                                                                                                                                                            |                                 |
| Registration and protocol                      | 24a    | Provide registration information for the review, including register name and registration number, or state that the review was not registered.                                                                                             |                                 |
|                                                | 24b    | Indicate where the review protocol can be accessed, or state that a protocol was not prepared.                                                                                                                                             |                                 |
|                                                | 24c    | Describe and explain any amendments to information provided at registration or in the protocol.                                                                                                                                            |                                 |
| Support                                        | 25     | Describe sources of financial or non-financial support for the review, and the role of the funders or sponsors in the review.                                                                                                              |                                 |
| Competing interests                            | 26     | Declare any competing interests of review authors.                                                                                                                                                                                         |                                 |
| Availability of data, code and other materials | 27     | Report which of the following are publicly available and where they can be found: template data collection forms; data extracted from included studies; data used for all analyses; analytic code; any other materials used in the review. |                                 |

From: Page MJ, McKenzie JE, Bossuyt PM, Boutron I, Hoffmann TC, Mulrow CD, et al. The PRISMA 2020 statement: an updated guideline for reporting systematic reviews. BMJ 2021;372:n71. doi: 10.1136/bmj.n71

For more information, visit: <http://www.prisma-statement.org/>

---

**Table S2: Search strategy terms and results:**

| Database                   | Keywords                                                                                                                                                                                                                                                                                                                                                                                                                        |
|----------------------------|---------------------------------------------------------------------------------------------------------------------------------------------------------------------------------------------------------------------------------------------------------------------------------------------------------------------------------------------------------------------------------------------------------------------------------|
| PubMed, Medline and Embase | ("coronavirus disease 2019"[Title/Abstract] OR "2019 novel coronavirus"[Title/Abstract] OR "SARS-CoV-2"[Title/Abstract] OR "2019-nCoV"[Title/Abstract] OR "COVID-19"[Title/Abstract]) AND (("neutrophil to lymphocyte ratio"[Title/Abstract] OR "neutrophil lymphocyte ratio"[Title/Abstract] OR "neutrophil to lymphocyte ratio"[Title/Abstract]) AND "neutrophil lymphocyte ratio"[Title/Abstract] AND "NLR"[Title/Abstract]) |
| SCOPUS                     | (TITLE-ABS-KEY(COVID-19) OR TITLE-ABS-KEY(COVID19) OR TITLE-ABS-KEY(COVID) OR TITLE-ABS-KEY("coronavirus disease 2019") OR TITLE-ABS-KEY(2019-ncov) OR TITLE-ABS-KEY(sars-cov-2)) AND (TITLE-ABS-KEY(neutrophil-to-lymphocyte)                                                                                                                                                                                                  |

|                  |                                                                                                                                                                                                                                                                                |
|------------------|--------------------------------------------------------------------------------------------------------------------------------------------------------------------------------------------------------------------------------------------------------------------------------|
|                  | OR TITLE-ABS-KEY(NLR)) AND (TITLE-ABS-KEY(sever*) OR TITLE-ABS-KEY("intensive care unit") OR TITLE-ABS-KEY(ICU) OR TITLE-ABS-KEY(mortality) OR TITLE-ABS-KEY(death) OR TITLE-ABS-KEY(non-survivor))                                                                            |
| Cochrane library | ("Covid-19" OR "COVID19" OR "COVID" OR "coronavirus disease 2019" OR "2019-nCoV" OR "SARS-CoV-2") in Title Abstract Keyword AND (neutrophil-to-lymphocyte OR NLR) in Title Abstract Keyword AND (sever* OR "intensive care unit" OR ICU OR mortality OR death OR non-survivor) |

| Table S3: Identification of various severity criteria for studies |                     |                                                                                                                                                                                                                                                                                                                                                                                                                                                                                                                    |                                                           |
|-------------------------------------------------------------------|---------------------|--------------------------------------------------------------------------------------------------------------------------------------------------------------------------------------------------------------------------------------------------------------------------------------------------------------------------------------------------------------------------------------------------------------------------------------------------------------------------------------------------------------------|-----------------------------------------------------------|
| Sl. No.                                                           | Study               | Severity criteria                                                                                                                                                                                                                                                                                                                                                                                                                                                                                                  | Non-severe criteria                                       |
| 1                                                                 | Asghar et al (43)   | ICU admitted patients were considered as having severe disease. Those not admitted to ICU were not considered severe                                                                                                                                                                                                                                                                                                                                                                                               | Those not admitted to ICU were not considered non-severe. |
| 2                                                                 | Bastug A et al (77) | Patients requiring treatment in an intensive care unit (ICU) on admission or at some point during hospital stay (ICU group) are considered as having severe disease.                                                                                                                                                                                                                                                                                                                                               | Those not admitted to ICU were not considered severe.     |
| 3                                                                 | Chen R et al (79)   | The severity of the disease was assessed according to the Seventh Version of the Novel Coronavirus Pneumonia Diagnosis and Treatment Guidance from the National Health Commission of China.                                                                                                                                                                                                                                                                                                                        | Those not were not considered severe.                     |
| 4                                                                 | Cheng B et al (62)  | Severe grade was defined as respiratory frequency of 30 breaths/min, blood oxygen saturation of 93%, oxygenation index <300 mmHg and/or lung infiltrates >50% within 24-48 hours.                                                                                                                                                                                                                                                                                                                                  | All other patients were non-severe                        |
| 5                                                                 | Ding X et al (80)   | Patients whose imaging showed that the pulmonary involvement significantly aggravated by more than 50% within 24–48 h were managed as severe type                                                                                                                                                                                                                                                                                                                                                                  | All other patients were non-severe                        |
| 6                                                                 | Fei M et al (44)    | Patients whose imaging showed that the pulmonary involvement significantly aggravated by more than 50% within 24–48 h were managed as severe type                                                                                                                                                                                                                                                                                                                                                                  | All other patients were non-severe                        |
| 7                                                                 | Fu J et al (81)     | The severe group consisted of severe and critical cases which fulfilled one of these criteria as follows: 1) respiratory distress ( $RR \geq 30$ bpm); 2) oxygen saturation $\leq 93\%$ ; 3) arterial partial pressure of oxygen ( $PaO_2$ )/fraction of inspired oxygen ( $FiO_2$ ) < 300 mm Hg; 4) patients with chest imaging that indicates an obvious progression of infiltrations within 24–48 h; 5) respiratory failure and requiring mechanical ventilation, shock or other organ failure need ICU support | All other patients were non-severe                        |
| 8                                                                 | Gong J et al (82)   | Not Mentioned                                                                                                                                                                                                                                                                                                                                                                                                                                                                                                      |                                                           |

|    |                         |                                                                                                                                                                                                                                                                                                                                                                                   |                                                                                                                                                                                                                                                                                                                               |
|----|-------------------------|-----------------------------------------------------------------------------------------------------------------------------------------------------------------------------------------------------------------------------------------------------------------------------------------------------------------------------------------------------------------------------------|-------------------------------------------------------------------------------------------------------------------------------------------------------------------------------------------------------------------------------------------------------------------------------------------------------------------------------|
| 9  | Guner R et al (83)      | Severe acute respiratory illness (SARI)/ critical disease according to WHO guidelines                                                                                                                                                                                                                                                                                             |                                                                                                                                                                                                                                                                                                                               |
| 10 | Hammad R et al (47)     | Severe patients additionally met at least one of the following conditions: (a) Shortness of breath, respiration rate $\geq 30$ times/min, (b) oxygen saturation (resting state) $\leq 93\%$                                                                                                                                                                                       | Non-severe patients met all following conditions: (a) history of exposure to a confirmed SARS-CoV-2 patient, (b) fever or other respiratory symptoms, and (c) typical chest computed tomography image abnormalities compatible with viral pneumonia.                                                                          |
| 11 | Hu H et al (48)         | Not Mentioned                                                                                                                                                                                                                                                                                                                                                                     |                                                                                                                                                                                                                                                                                                                               |
| 13 | Kazancioglu S et al(86) | The severe illness was defined as:<br>1. Respiratory frequency $>30$ breaths per min,<br>2. SpO <sub>2</sub> $<94\%$ on room air at sea level, a ratio of the arterial partial pressure of oxygen to fraction of inspired oxygen (PaO <sub>2</sub> /FiO <sub>2</sub> ) $<300$ or lung infiltrates $>50\%$ .                                                                       | All other patients were non-severe                                                                                                                                                                                                                                                                                            |
| 14 | Kong M et al (87)       | The condition was considered as severe-type COVID-19 when one of the following criteria was present:<br>(1) Respiratory distress with respiratory rate $>30$ /min;<br>(2) oxygen saturation $\leq 93\%$ in the resting state; or<br>(3) arterial blood oxygen partial pressure (PaO <sub>2</sub> )/oxygen concentration (FiO <sub>2</sub> ) $\leq 300$ mmHg (1 mmHg = 0.133 kPa). | All other patients were non-severe                                                                                                                                                                                                                                                                                            |
| 15 | Liao D et al (89)       | Severe cases were defined as respiratory distress ( $\geq 30$ breaths per min), oxygen saturation of 93% or less at rest, ratio of arterial partial pressure of oxygen to fractional concentration of oxygen in inspired air of 40 kPa or less, or more than 50% lesion progression over 24–48 h in pulmonary imaging.                                                            | Moderate disease was defined as fever and respiratory symptoms with radiological findings of pneumonia but without the severe or critical features. Patients with mild disease, defined as mild clinical symptoms and no sign of pneumonia on imaging, did not require hospital admission so were not included in this study. |
| 16 | Lin S et al(90)         | Severe disease: respiratory failure requiring mechanical ventilation, shock, and/or combined organ failure requiring admission to the intensive care unit.                                                                                                                                                                                                                        | Mild disease: fever, respiratory symptoms, and imaging findings suggestive of pneumonia;<br>moderate disease: respiratory distress with a respiratory rate of $\geq 30$ breaths/min, mean oxygen saturation of $\leq 93\%$ in a resting state, and/or arterial blood oxygen partial pressure of $\leq 300$ mmHg               |

|    |                    |                                                                                                                                                                                                                                                                                                                                                                                                                                                                                                                                                                                                                                                                                                              |                                                                                                                                                                                                                              |
|----|--------------------|--------------------------------------------------------------------------------------------------------------------------------------------------------------------------------------------------------------------------------------------------------------------------------------------------------------------------------------------------------------------------------------------------------------------------------------------------------------------------------------------------------------------------------------------------------------------------------------------------------------------------------------------------------------------------------------------------------------|------------------------------------------------------------------------------------------------------------------------------------------------------------------------------------------------------------------------------|
| 17 | Liu F et al (91)   | <p>Severe illness was defined as a condition with any severe event based on one major criterion, two or more minor criteria, or two criteria of additional organ dysfunction, as follows:</p> <p>(a) Major criteria: respiratory failure requiring mechanical ventilation; shock with the need for vasopressors; extracorporeal membrane oxygenation (ECMO) treatment;</p> <p>(b) Minor criteria: multilobar infiltrates; respiratory rate <math>\geq 30</math> breaths/min; arterial oxygen pressure (PaO<sub>2</sub>) <math>&lt; 60</math> mmHg; PaO<sub>2</sub>/FiO<sub>2</sub> ratio <math>\leq 300</math> mmHg; oxygen saturation <math>\leq 93\%</math>; hemoptysis 24 h <math>\geq 100</math> mL;</p> | All other patients were non-severe                                                                                                                                                                                           |
| 18 | Liu J et al (50)   | <p>Severe: met any of the following: (a) respiratory distress, respiratory rate <math>\geq 30</math> beats/min; (b) in the resting state, mean oxygen saturation <math>\leq 93\%</math>; (c) arterial blood oxygen partial pressure/oxygen concentration <math>\leq 300</math> mmHg (1 mmHg = 0.133 kPa).</p> <p>(4) critical, meets any of the following: (a) respiratory failure occurs and requires mechanical ventilation; (b) Shock occurs; (c) ICU admission is required for combined organ failure.</p>                                                                                                                                                                                               | All other patients were non-severe                                                                                                                                                                                           |
| 19 | Liu Y et al (51)   | <p>Severe: patient who meets any of the following conditions: patients present respiratory distress with respiratory rate <math>\geq 30</math> breath/min, SpO<sub>2</sub> (oxygen saturation) <math>\leq 93\%</math> on room air, and PaO<sub>2</sub> (arterial blood oxygen partial pressure)/FiO<sub>2</sub> (fraction of inspired oxygen) <math>\leq 300</math> mmHg (1 mmHg = 0.133 kPa);</p> <p>Critical: patient meets any of the following conditions: patient presents respiratory failure and requires mechanical ventilation support, patient presents shock, and patient presents multiple organ dysfunction syndrome and requires ICU admission</p>                                             | <p>mild: patients present mild symptoms with no imaging sign of pneumonia;</p> <p>common: patients have fever and respiratory tract symptom with imaging sign of pneumonia</p>                                               |
| 20 | Ok F et al (45)    | Severe patients also had at least one of the following features; PaO <sub>2</sub> /FiO <sub>2</sub> $\leq 300$ mm Hg, or oxygen saturation (at rest) less than 93%, or shortness of breath, respiratory rate $\geq 30$ times/minute.                                                                                                                                                                                                                                                                                                                                                                                                                                                                         | Nonsevere patients met all of the features such as the history of contact, respiratory symptoms or fever, typical viral pneumonia involvement in computed tomography, and positive test result of RT-PCR for SARS-CoV-2 RNA. |
| 21 | Qin C et al (93)   | Those who met the following criteria were defined as having severe-type infection: (1) respiratory distress with a respiratory rate over 30 breaths per minute, (2) oxygen saturation $\leq 93\%$ in the resting state, and (3) arterial blood oxygen partial pressure (PaO <sub>2</sub> ) /oxygen concentration (FiO <sub>2</sub> ) $\leq 300$ mm Hg.                                                                                                                                                                                                                                                                                                                                                       | All other patients were non-severe                                                                                                                                                                                           |
| 22 | Sayah W et al (52) | The patients were classified based on the severity of symptoms according to the World Health Organization (WHO) interim guidance for COVID-19                                                                                                                                                                                                                                                                                                                                                                                                                                                                                                                                                                | All other patients were non-severe                                                                                                                                                                                           |

|    |                        |                                                                                                                                                                                                                                                                                                                                                                                                                                                                                                                                           |                                                                                                                                                                                                                                                                                                                                                                                               |
|----|------------------------|-------------------------------------------------------------------------------------------------------------------------------------------------------------------------------------------------------------------------------------------------------------------------------------------------------------------------------------------------------------------------------------------------------------------------------------------------------------------------------------------------------------------------------------------|-----------------------------------------------------------------------------------------------------------------------------------------------------------------------------------------------------------------------------------------------------------------------------------------------------------------------------------------------------------------------------------------------|
| 23 | Sayed A et al (58)     | Intensive care unit admission criteria were as follows: a temperature of 38.5°C accompanied with a decrease in mean arterial pressure below 60 mmHg or shortness of breath that is New York Heart Association (NYHA) class III or higher which is characterized as “marked limitation in activity due to symptoms, even during less-than-ordinary activity, example: walking short distances (20-100 m). Comfortable only at rest.                                                                                                        | confirmed cases by qPCR, symptomatic, low oxygen saturation <94% on room air and clinical or radiological evidence of pneumonia.                                                                                                                                                                                                                                                              |
| 24 | Seo J et al (53)       | Oxygen was supplied to patients with oxygen saturation less than 93% in room air. The definition of ARDS is a partial pressure of arterial oxygen (PaO <sub>2</sub> )/percentage of inspired oxygen (FiO <sub>2</sub> ) of <300 mmHg                                                                                                                                                                                                                                                                                                      | Pulmonary infiltration was classified as patchy, confluent, or nodular, and unilateral or bilateral, by at least two physicians in each hospital. The area of pulmonary infiltration was analyzed by using DEEP:PHI (medical AI software; DEEPNOD, Seoul, Republic of Korea) which is an open platform that supports medical imaging artificial intelligence (AI) model research efficiently. |
| 25 | Sepulchre E et al (54) | The unfavorable evolution (UFE) group included patients admitted to intensive care unit (ICU) and/or patients who died during hospitalization                                                                                                                                                                                                                                                                                                                                                                                             | the favorable evolution (FE) group included the non-ICU surviving patients.                                                                                                                                                                                                                                                                                                                   |
| 26 | Shang W et al (55)     | The intensive and critical types were classified as a severe group.<br>Intensive type met any of the following: shortness of breath, respiratory rate more than 30 times/min; resting state, oxygen saturation less than equal to 93%; or partial pressure of arterial oxygen (PaO <sub>2</sub> )/oxygen concentration (FiO <sub>2</sub> ) ≤ 30 mm Hg (1 mm Hg = 0.133 kPa); the critical type was defined as respiratory failure requiring mechanical ventilation, shock, or other organ failure requiring ICU monitoring and treatment. | The light and ordinary types were classified as the non-severe group<br>Light type: no pneumonia on imaging; Ordinary type: fever and respiratory tract symptoms with pneumonia in imaging;                                                                                                                                                                                                   |
| 27 | Shi S et al (56)       | An adverse prognosis was considered as the admission to the intensive care unit (ICU) or death.<br>He criterion for admission to the ICU was either (a) respiratory failure occurrence that requires mechanical ventilation;<br>(b) Shock occurrence; or<br>(c) Combined with other organ failure requiring ICU monitoring and treatment.                                                                                                                                                                                                 | All other patients were non-severe                                                                                                                                                                                                                                                                                                                                                            |
| 28 | Sun S et al (57)       | Severe cases: Those who have one of the following three clinical manifestations: (1). shortness of breath with RR > 30 times/min; (2). mean oxygen saturation ≤ 93% in resting state; (3). partial pressure of arterial oxygen (PaO <sub>2</sub> )/oxygen Concentration (FiO <sub>2</sub> ) ≤ 300 mmHg (1 mmHg = 0.133 kPa).                                                                                                                                                                                                              | Common cases: Those who have fever, respiratory tract symptoms, and pneumonia on imaging.                                                                                                                                                                                                                                                                                                     |

|    |                   |                                                                                                                                                                                                                                                                                                                                                                                                                                           |                                                                                                                                                                                                                      |
|----|-------------------|-------------------------------------------------------------------------------------------------------------------------------------------------------------------------------------------------------------------------------------------------------------------------------------------------------------------------------------------------------------------------------------------------------------------------------------------|----------------------------------------------------------------------------------------------------------------------------------------------------------------------------------------------------------------------|
| 29 | Wang C et al (42) | Meanwhile, in addition to having the symptoms and signs of moderate cases, severe cases also showed (I) respiratory distress and respiratory rate (RR) $\geq 30$ times/minute; (II) oxygen saturation $\leq 93\%$ under rest state; (III) oxygen partial pressure (PaO <sub>2</sub> )/oxygen concentration (FiO <sub>2</sub> ) in the arterial blood $\leq 300$ mmHg; and (IV) lung imaging progress $>50\%$ in the short term (24–48 h). | The clinical standards for the identification of moderate cases were fever, respiratory track symptoms, and pneumonia imaging (multiple small patches and stromal changes, and the lung extraneous zone was obvious) |
| 30 | Wang F et al (94) | All 333 COVID-19 patients were classified as mild, moderate, severe or critically ill category at admission. The diagnostic standard and classifying criteria of COVID-19 were based on the interim guidance from the WHO                                                                                                                                                                                                                 | All other patients were non-severe                                                                                                                                                                                   |
| 31 | Wang K et al (59) | Severe type – adults with any of the following: (1) respiratory distress, RR $\geq 30$ beats/min, (2) oxygen saturation of $\leq 93\%$ during inhalation at rest, (3) an arterial partial pressure of oxygen (PaO <sub>2</sub> )/fraction of inspired oxygen (FiO <sub>2</sub> ) of $\leq 300$ mm Hg and (4) chest imaging indicating an obvious $\geq 50\%$ progression of infiltrations within 24–48 h.                                 | Light type – mild clinical symptoms with no pneumonia on imaging. Mild/moderate disease type – fever with respiratory symptoms and presence of pneumonia on imaging.                                                 |
| 32 | Wang W et al(95)  | Critical patients and non-critical patients (including severe and mild patients) were categorized based on the 7th edition of the Chinese National Health Commission,6 meeting any of the following criteria:<br>(a)respiratory failure required mechanical ventilation;<br>(b) the patient was prone to shock;<br>(c)the patient with multiple organ failure required ICU treatment.                                                     | All other patients were non-severe                                                                                                                                                                                   |
| 33 | Wang X et al (41) | For severe pneumonia (meeting any of the following): (1) dyspnoea, respiratory rate of $\geq 30$ breaths/min; (2) peripheral oxygen saturation $\leq 93\%$ at rest and (3) oxygen partial pressure/oxygen uptake fraction of $\leq 300$ mmHg (1 mmHg = 0.133 kPa).                                                                                                                                                                        | For non-severe pneumonia: the above criteria were not met.                                                                                                                                                           |
| 34 | Wu S et al (96)   | A total of 270 patients infected with laboratory-identified SARS-CoV-2 were classified into 2 groups, moderately ill and severely or critically ill, according to the Guidance for Corona Virus Disease 2019 (6th edition)                                                                                                                                                                                                                | All other patients were non-severe                                                                                                                                                                                   |
| 35 | Xia X et al (60)  | severe diagnostic criteria: meet the above diagnostic criteria and have any of the following: respiratory distress, respiratory rate (RR) $\geq 30$ beats/min; at rest, Refers to pulse oxygen saturation (SPO <sub>2</sub> ) $\leq 93\%$ ; arterial partial pressure of oxygen (PaO <sub>2</sub> )/inhaled oxygen concentration (FIO <sub>2</sub> ) $\leq 300$ mmHg                                                                      | Common diagnostic criteria: fever, respiratory symptoms, and imaging findings of pneumonia                                                                                                                           |
| 36 | Xie G et al (97)  | Severe and non-severe cases were defined according to WHO interim guidance.                                                                                                                                                                                                                                                                                                                                                               |                                                                                                                                                                                                                      |

|    |                     |                                                                                                                                                                                                                                                                                                                                                                                                                                                                                                                                                                                                                                                                                                                                                                                                                                      |                                                                                                                                                                                                                                   |
|----|---------------------|--------------------------------------------------------------------------------------------------------------------------------------------------------------------------------------------------------------------------------------------------------------------------------------------------------------------------------------------------------------------------------------------------------------------------------------------------------------------------------------------------------------------------------------------------------------------------------------------------------------------------------------------------------------------------------------------------------------------------------------------------------------------------------------------------------------------------------------|-----------------------------------------------------------------------------------------------------------------------------------------------------------------------------------------------------------------------------------|
| 37 | Xie L et al (98)    | <p>Severe cases Adult cases meeting any of the following criteria: (a) respiratory distress (<math>\geq 30</math> breaths/ min); (b) oxygen saturation <math>\leq 93\%</math> at rest; (c) arterial partial pressure of oxygen (PaO<sub>2</sub>)/ fraction of inspired oxygen (FiO<sub>2</sub>) <math>\leq 300</math> mmHg (1 mmHg = 0.133 kPa).</p> <p>Critical cases Cases meeting any of the following criteria: (a) respiratory failure and requiring mechanical ventilation; (b) shock; (c) with other organ failure that requires ICU care</p>                                                                                                                                                                                                                                                                                 | <p>Mild cases: The clinical symptoms were mild, and there was no sign of pneumonia on imaging.</p> <p>Moderate cases Showing fever and respiratory symptoms with radiological findings of pneumonia.</p>                          |
| 38 | Xue G et al (46)    | Mild to moderate or severe-critically ill cases of COVID-19 were diagnosed according to the Guidance for Corona Virus Disease 2019 (7th edition) by the National Health Commission of China                                                                                                                                                                                                                                                                                                                                                                                                                                                                                                                                                                                                                                          |                                                                                                                                                                                                                                   |
| 39 | Yang AP et al (61)  | Severe patients additionally met at least one of the following conditions: (1) Shortness of breath, RR $\geq 30$ times/min, (2) Oxygen saturation (Resting state) $\leq 93\%$ , (3) PaO <sub>2</sub> /FiO <sub>2</sub> $\leq 300$ mmHg.                                                                                                                                                                                                                                                                                                                                                                                                                                                                                                                                                                                              | Non-severe patients met all following conditions: (1) Epidemiology history, (2) Fever or other respiratory symptoms, (3) Typical CT image abnormalities of viral pneumonia, and (4) Positive result of RT-PCR for SARS-CoV-2 RNA. |
| 40 | Zhang Y et al (103) | According to the guidelines for the diagnosis and treatment of novel coronavirus (2019-nCoV) infection by the National Health Commission (Trial Version 5), <sup>7</sup> at the time of hospitalisation, patients with one of respiratory rate $> 30$ breaths/min, SpO <sub>2</sub> $< 93\%$ on room air, or PaO <sub>2</sub> /FiO <sub>2</sub> $\leq 300$ mm Hg, were classified as severe cases and the others were classified as mild cases.                                                                                                                                                                                                                                                                                                                                                                                      |                                                                                                                                                                                                                                   |
| 41 | Zhou Y et al (104)  | Severe: with any of the following: respiratory distress with RR $>30$ time/min, oxygen saturation at rest $<93\%$ , or PaO <sub>2</sub> /FiO <sub>2</sub> $<300$ mmHg (1 mmHg = 0.133 kPa); (4) critically severe: with any of the following: respiratory failure needing mechanical ventilation, shock, or combination with other organ failure needing ICU intensive care.                                                                                                                                                                                                                                                                                                                                                                                                                                                         | Moderate: with fever, respiratory symptoms, and imaging presentations of pneumonia;                                                                                                                                               |
| 42 | Zhu Z et al (105)   | Severe patients should meet at least one of the following criterions: First, shortness of breath with respiration rate (RR) 30 times/min. Second, oxygen saturation 93% in resting state. Third, partial pressure of arterial oxygen (PaO <sub>2</sub> )-to-fraction of inspired oxygen (FiO <sub>2</sub> ) ratio 300 mm Hg. Obvious lesion progression $>50\%$ within 24-48 hours on pulmonary imaging were also recognized as severe cases. Critical cases were defined when one of the following conditions met: First, respiratory failure and require mechanical ventilation. Second, shock occurred. Third, combined with other organ failure and treated in intensive care unit. Mild and moderate cases were defined as non-severe group, while severe and critical patients were categorized as severe group in this study. | All other patients were non-severe                                                                                                                                                                                                |

**Table S4. The characteristics of included studies comparing severe and non-severe COVID-19 patients.**

| Table S3            |          |                |            |               |        |                              |         |          |        |          |        |          |        |                  |         |
|---------------------|----------|----------------|------------|---------------|--------|------------------------------|---------|----------|--------|----------|--------|----------|--------|------------------|---------|
| Author              | Country  | Groups         | Sample (N) | M/F (male %)  | p      | Age (years)                  | p       | DM       | p      | HT       | p      | CVD      | p      | NLR Value        | p       |
|                     |          |                |            |               |        | Mean $\pm$ SD / Median (IQR) |         | N (%)    |        | N (%)    |        | N (%)    |        | Mean $\pm$ SD    |         |
| Asgar M et al       | Pakistan | Severe         | 33         | 69/31(69)     | 0.572  | 52.58 $\pm$ 15.68            | <0.001  | 41(41)   | 0.452  | 32(32)   | 0.97   | 13(13)   | 0.334  | 9.11 $\pm$ 2.26  | <0.001  |
|                     |          | Non-severe     | 67         |               |        |                              |         |          |        |          |        |          |        | 3 $\pm$ 1.2      |         |
| Bastug A et al      | Turkey   | Non-Severe     | 145        | 81/64(55.9)   | <0.001 | 43(18-83)                    | <0.001  | 12(8.3)  | <0.001 | 31(21.4) | <0.001 | 8(3.5)   | <0.001 | 2.4 $\pm$ 3.17   | <0.001  |
|                     |          | Severe         | 46         | 26/20(56.5)   |        |                              |         |          |        |          |        |          |        | 9 $\pm$ 8.12     |         |
| Chen R et al        | China    | Critical       | 48         | 38/10 (79)    | NR     | 61 $\pm$ 14                  | NR      | 5 (10)   | NR     | 23 (48)  | NR     | 7 (15)   | NR     | 16.06 $\pm$ 3.77 | <0.001* |
|                     |          | Severe         | 155        | 93/62 (60)    |        |                              |         |          |        |          |        |          |        | 8.96 $\pm$ 2.07  |         |
|                     |          | Mild/moderate  | 345        | 182/163 (53)  |        |                              |         |          |        |          |        |          |        | 3.37 $\pm$ 0.76  |         |
| Cheng B et al       | China    | Non-Severe     | 205        | 71/134(34.6)  | <0.001 | 48.95 $\pm$ 18.17            | <0.001  | 20(9.7)  | <0.003 | 48(23.4) | <0.002 | 15(23.4) | 0.013  | 2 $\pm$ 0.30     | <0.001  |
|                     |          | Severe         | 251        | 140/111(55.7) |        |                              |         |          |        |          |        |          |        | 3.37 $\pm$ 0.6   |         |
| Ding X et al        | China    | Severe         | 15         | 9/6 (60)      | 0.216  | 67 (55-76)                   | <0.001* | 5 (7)    | NR     | 9 (13)   | NR     | 6 (8)    | NR     | 4.8 $\pm$ 2.10   | 0.002*  |
|                     |          | Non-severe     | 57         | 24/33 (42)    |        |                              |         |          |        |          |        |          |        | 1.9 $\pm$ 0.4    |         |
| Fu J et al          | China    | Severe         | 16         | 10/6 (63)     | 0.818  | 52 $\pm$ 13                  | 0.095   | 4 (5)    | NR     | 7 (9)    | NR     | NR       | NR     | 6.29 $\pm$ 3.72  | 0.001*  |
|                     |          | Mild/moderate  | 59         | 35/24 (59)    |        |                              |         |          |        |          |        |          |        | 2.33 $\pm$ 1.22  |         |
| Gong J et al        | China    | Severe         | 28         | 16/12 (57)    | 0.3    | 64 (55-72)                   | <0.01*  | NR       | NR     | NR       | NR     | NR       | NR     | 3.7 $\pm$ 1.37   | <0.01*  |
|                     |          | Non-severe     | 161        | 72/89 (45)    |        |                              |         |          |        |          |        |          |        | 1.9 $\pm$ 0.25   |         |
| Guner R et al       | Turkey   | SARI/Critical  | 50         | 33/17 (66)    | 0.285  | 62 $\pm$ 12                  | <0.001* | 10 (20)  | 0.127  | 16 (32)  | 0.104  | 20 (40)  | 0.006* | 5.6 $\pm$ 9.12   | <0.001* |
|                     |          | Mild/pneumonia | 172        | 99/73 (58)    |        |                              |         |          |        |          |        |          |        | 2.5 $\pm$ 4.6    |         |
| Hammad R et al      | Egypt    | Severe         | 34         | 28/36(43.7%)  | <0.001 | 60(52-67)                    | <0.001  | NR(26.6) | NR     | NR(34.4) | NR     | NR       | NR     | 10 $\pm$ 2.57    | <0.001  |
|                     |          | Non-Severe     | 30         |               |        |                              |         |          |        |          |        |          |        | 1.23 $\pm$ 0.2   |         |
| Hu H et al          | China    | Mild           | 19         | 11/8(57.9)    | 0.796  | 43(36-64)                    | 0.08    | 2(10.5)  | 0.66   | 3(15.8)  | 0.032  | 1(5.3)   | 1      | 3.14 $\pm$ 0.8   | <0.001  |
|                     |          | Severe         | 21         | 13/8(61.9)    |        |                              |         |          |        |          |        |          |        | 10.58 $\pm$ 4.16 |         |
| Kazancioglu S et al | Turkey   | Non-Severe     | 85         | 52/33(61.2)   | 0.682  | 39(16-75)                    | <0.001  | 6(7.1)   | 0.106  | 12(14.1) | 0.003  | 2(2.4)   | 0.022  | 2.31 $\pm$ 1.52  | <0.001  |

|                   |              |                        |     |               |         |                |          |           |        |           |         |           |         |              |          |
|-------------------|--------------|------------------------|-----|---------------|---------|----------------|----------|-----------|--------|-----------|---------|-----------|---------|--------------|----------|
|                   |              | Severe                 | 35  | 20/15(57.1)   |         | 59(37-83)      |          | 6(17.1)   |        | 14(40)    |         | 5(14.3)   |         | 4.04 ± 3.50  |          |
| Kong M et al      | China        | Severe                 | 87  | 45/42 (52)    | 0.592   | 68 ± 12        | 0.005*   | 18 (21)   | 0.004* | 47 (54)   | <0.001* | 11 (13)   | 0.195   | 6.6 ± 1.5    | <0.001*  |
|                   |              | Mild                   | 123 | 59/64 (48)    |         | 53 ± 16        |          | 9 (7)     |        | 32 (26)   |         | 9 (7)     |         | 3.3 ± 0.4    |          |
| Liao D et al      | China        | Critical               | 86  | 61/25 (71)    | 0.0011* | 68 (61-78)     | <0.0001* | 17 (20)   | 0.017* | 28 (33)   | 0.21    | 8 (9)     | 0.085   | 16.02 ± 3.05 | <0.0001* |
|                   |              | Severe                 | 145 | 76/69 (52)    |         | 67 (58-76)     |          | 30 (21)   |        | 49 (34)   |         | 8 (6)     |         | 4.71 ± 0.86  |          |
|                   |              | Moderate               | 149 | 69/80 (46)    |         | 56 (42-68)     |          | 14 (9)    |        | 37 (25)   |         | 4 (3)     |         | 2.67 ± 0.39  |          |
| Lin S et al       | China        | Mild                   | 22  | 44/11         | 0.448   | 44±11.3        | <0.001   | 1(4.5)    | 0.821  | 3(15.8)   | 0.172   | 0         | NR      | 2.55 ± 0.65  | <0.001   |
|                   |              | Severe                 | 46  | 29/17         |         | 56.4±13.4      |          | 3(6.5)    |        | 13(32.6)  |         | 3(6.5)    |         | 9 ± 2.2      |          |
| Liu F et al       | China        | Severe                 | 19  | 15/4 (79)     | 0.006*  | 63 (40-66)     | 0.086    | 3 (16)    | 0.152  | 6 (32)    | 0.217   | 1 (5)     | 0.54    | 3.85 ± 0.75  | 0.010*   |
|                   |              | Non-severe             | 115 | 48/67 (42)    |         | 50 (36-64)     |          | 7 (6)     |        | 21 (18)   |         | 4 (4)     |         | 2.7 ± 0.31   |          |
| Liu J et al       | China        | Severe                 | 79  | 46/33 (58)    | 0.849   | 65 (54-71)     | 0.008*   | 13 (17)   | 0.082  | 37 (47)   | 0.086   | 2 (3)     | 0.54    | 8.83 ± 1.88  | <0.001*  |
|                   |              | Common                 | 43  | 26/17 (61)    |         | 55 (38-66)     |          | 2 (5)     |        | 13 (30)   |         | 0 (0)     |         | 3.11 ± 0.76  |          |
| Liu YP et al      | China        | Severe                 | 23  | 47/37(56)     | NR      | 67(31-91)      | 0.125    | 3(13)     | 0.378  | 10(43.5)  | 0.001   | 6(26.1)   | 0.004   | 4.3 ± 2.66   | <0.001   |
|                   |              | Non-severe             | 61  |               |         | 51(20-83)      |          | 4(6.6)    |        | 6(9.8)    |         | 2(3.3)    |         | 5.17 ± 16.52 |          |
| Ok F et al        | Turkey       | Severe                 | 54  | 24/30 (44)    | 0.976   | 68 ± 15        | <0.001*  | 3 (13)    | 0.378  | 10 (44)   | 0.001*  | 6 (26)    | 0.004*  | 6.1 ± 3.78   | <0.001*  |
|                   |              | Non-severe             | 85  | 38/47 (45)    |         | 47 ± 16        |          | 4 (7)     |        | 6 (10)    |         | 2 (3)     |         | 2.46 ± 1.7   |          |
| Qin C et al       | China        | Severe                 | 286 | 155/131 (54)  | 0.242   | 61 (51-69)     | <0.001*  | 53 (19)   | 0.152  | 105 (37)  | <0.001* | 24 (8)    | 0.004*  | 5.5 ± 1.11   | <0.001*  |
|                   |              | Non-severe             | 166 | 80/86 (48)    |         | 53 (41-62)     |          | 22 (13)   |        | 30 (18)   |         | 3 (2)     |         | 3.2 ± 0.51)  |          |
| Sayah W et al     | Algeria      | Non-severe             | 73  | 46/27(63)     | 0.294   | 57±13.4        | 0.0003   | 4(11)     | 0.0006 | 8(22)     | 0.072   | 0(0)      | NR      | 3.5 ± 0.58   | <0.0001  |
|                   |              | Severe                 | 60  | 57/23(11)     |         | 65±13.5        |          | 26(45)    |        | 29(45)    |         | 7(12)     |         | 8.2 ± 2.05   |          |
| Sayed A et al     | Saudi Arabia | Non-severe             | 660 | 295/365(44.7) | 0.12    | 35(34.6-37.26) | 0.0062   | NR        | NR     | NR        | NR      | NR        | NR      | 2.85 ± 0.16  | 0.0014   |
|                   |              | Severe                 | 41  | 22/19(53.66)  |         | 45(36.5-52.4)  |          |           | NR     | NR        | NR      | NR        | NR      | 5.5 ± 1.44   |          |
| Seo J et al       | South Korea  | without ARDS           | 129 | 56/73(43)     | 0.095   | 56±17          | <0.001   | 19 (15)   | 0.006  | 38 (30)   | 0.002   | 10 (8)    | 0.459   | NR           | -        |
|                   |              | with ARDS              | 37  | 22/15 (60)    |         | 72±11          |          | 13 (35)   |        | 21 (57)   |         | 1 (3)     |         | NR           | -        |
| Sepulchre E et al | Belgium      | favourable evolution   | 138 | 72/66(52.17)  | 0.0106  | 60 (47– 74)    | 0.0136   | 36(26.28) | 0.2286 | 52(37.68) | 0.1058  | 25(18.12) | 0.1724  | 4 (3-5)      | <0.0001  |
|                   |              | unfavourable evolution | 60  | 43/17 (71.67) |         | 66.5 (57– 76)  |          | 11(18.33) |        | 30(50)    |         | 16(26.67) |         | 7 (4-11)     |          |
| Shang W et al     | China        | Severe                 | 139 | 82/57 (59)    | 0.008*  | 64 (54-73)     | <0.001*  | 20 (14)   | 0.946  | 45 (32)   | 0.382   | 25 (18)   | <0.001* | 4.75 ± 1.15  | <0.001*  |

|               |       |                    |     |              |        |                    |         |           |         |           |        |           |         |                     |          |
|---------------|-------|--------------------|-----|--------------|--------|--------------------|---------|-----------|---------|-----------|--------|-----------|---------|---------------------|----------|
|               |       | Non-severe         | 304 | 138/166 (45) |        | 58 (47-67)         |         | 43 (14)   |         | 86 (28)   |        | 19 (6)    |         | 2.38 ± 0.35         |          |
| Shi S et al   | China | Non-severe         | 51  | 27/24(61.1)  | NR     | 58(22-82)          | NR      | 6(11.8)   | NR      | NR        | NR     | NR        | NR      | 2.2 ± 0.32          | <0.001   |
|               |       | Severe             | 36  | 22/14(38.9)  |        | 66(39-88)          |         | 12(33.3)  |         |           |        |           |         | 6.78 ± 2.01         |          |
| Sun S et al   | China | Severe             | 27  | 18/9 (67)    | 0.076  | 62 (53-71)         | <0.001* | NR        | NR      | NR        | NR     | NR        | NR      | 8.71 ± 2.65         | <0.001*  |
|               |       | Common             | 89  | 42/47 (47)   |        | 47 (37-55)         |         | NR        |         | NR        |        | NR        |         | 2.41 ± 0.29         |          |
| Wang C et al  | China | Moderate           | 35  | 17/18(48.6)  | 0.78   | 38(16-62)          | 0.121   | 2(5.7)    | 0.441   | 1(2.9)    | 0.042  | NR        | NR      | 7.93±8.36           | <0.001   |
|               |       | Severe             | 10  | 6/4(60)      |        | 43(28-62)          |         | 2(20)     |         | 3(30)     |        | NR        |         | 29.9±18.7           |          |
| Wang F et al  | China | Severe             | 70  | 45/25 (64)   | 0.002* | 60 (49-64)         | <0.001* | NR        | NR      | NR        | NR     | NR        | NR      | 2.72 ± 0.62         | <0.001*  |
|               |       | Non-severe         | 253 | 109/144 (43) |        | 41 (32-56)         |         | NR        |         | NR        |        | NR        |         | 1.72 ± 0.22         |          |
| Wang K et al  | China | Mild-Moderate      | 33  | 22/16(57.9)  | 0.651  | 45±2               | <0.0199 | 1(2.6)    | 0.249   | 6(15.8)   | 0.279  | 1(2.6)    | 0.249   | 2.14±0.1            | 0.001    |
|               |       | Severe             | 5   | 3/2 (7.9%)   |        | 60±6               |         | 1(2.6)    |         | 2(5.3)    |        | 1(2.6)    |         | 21.39±20.08         |          |
| Wang W et al  | China | Severe             | 50  | 28/22(56)    | 0.203  | 79.5(68-87)        | <0.001  | 11(22)    | 0.991   | 31(62)    | 0.002  | 14(28)    | 0.007   | 9.3 ± 2.32          | <0.001   |
|               |       | Non-Severe         | 73  | 32/41(43.8)  |        | 61(50-68)          |         | 16(50-68) |         | 25(34.2)  |        | 7(9.5)    |         | 1.83 ± 0.12         |          |
| Wang X et al  | China | Severe             | 20  | 49/70(41.2)  | 0.251  | 63.5(56-69)        | <0.001  | 25(21)    | 0.719   | 47(39.5)  | 1      | 12(10.1)  | 0.617   | 7.12 ± 1.91         | <0.001   |
|               |       | Non-severe         | 111 | 7/5(58.3)    |        | 80(70-85)          |         | 3(25)     |         | 5(41.7)   |        | 2(16.7)   |         | 2.21 ± 1.39         |          |
| Wu S et al    | China | Severe or critical | 67  | 45/22 (67)   | NR     | 66 (54-73)         | NR      | 8 (12)    | NR      | 22 (33)   | NR     | 6 (9)     | NR      | 5.8 ± 2.42          | NR       |
|               |       | Moderate           | 203 | 86/117 (42)  |        | 61 (50-68)         |         | 27 (13)   |         | 59 (29)   |        | 5 (3)     |         | 2.2 ± 0.31          |          |
| Xia X et al   | China | Moderate           | 32  | 15/17        | NR     | 62.25±15.07        | NR      | 3(9.35)   | NR      | 9 (28.12) |        | 0 (0)     | NR      | 2.89 (1.77 – 5.56)  | 0        |
|               |       | severe             | 31  | 18/13        | NR     | 64.55±14.88        | NR      | 9(29.03)  | NR      | 15(48.38) |        | 2(6.45)   | NR      | 8.78 (5.76 – 25.10) |          |
| Xie G et al   | China | Severe             | 12  | 10/2 (83)    | 0.003* | 52 (35-66)         | 0.092   | 2 (17)    | 0.068   | 4 (33)    | 0.042* | 2 (17)    | 0.032*  | 3.52 ± 1.44         | 0.026*   |
|               |       | Non-severe         | 85  | 43/42 (51)   |        | 45 (32-60)         |         | 3 (4)     |         | 16 (19)   |        | 5 (6)     |         | 2.74 ± 0.32         |          |
| Xie L et al   | China | Severe             | 51  | 29/22 (57)   | 0.039* | NR                 | NR      | 8 (16)    | 0.0466* | 12 (24)   | 0.379  | 6 (12)    | 0.0130* | 7.90 ± 10.20        | <0.0001* |
|               |       | Non-severe         | 322 | 168/154 (52) |        | NR                 |         | 21 (7)    |         | 59 (18)   |        | 12 (4)    |         | 2.93 ± 1.80         |          |
| Xue G et al   | China | Severe             | 58  | 34/24        | 0.587  | 64.00(49.75–73.00) | 0.527   | 5(8.62)   | 0.09    | 15(25.86) | 0.164  | 6(10.34)  | 0.164   | 6.57 ± 1.66         | <0.001   |
|               |       | Non-Severe         | 56  | 30/26        |        | 60.50(52.25–68.75) |         | 11(19.64) |         | 22(39.29) |        | 11(19.64) |         | 3.03 ± 0.63         |          |
| Yang AP et al | China | Severe             | 24  | 18/6 (75)    | 0.135  | 58 ± 12            | <0.05*  | 13 (54)   | <0.01*  | 16 (67)   | <0.01* | 9 (38)    | <0.01*  | 20.7 ± 24.1         | <0.01*   |
|               |       | Non-severe         | 69  | 38/31 (55)   |        | 42 ± 19            |         | 8 (12)    |         | 7 (10)    |        | 4 (6)     |         | 4.8 ± 3.5           |          |

|               |       |                   |     |               |        |           |         |        |       |         |        |        |           |               |         |
|---------------|-------|-------------------|-----|---------------|--------|-----------|---------|--------|-------|---------|--------|--------|-----------|---------------|---------|
| Zhang Y et al | China | Severe            | 31  | 20/11 (65)    | 0.004* | 65 ± 13   | <0.001* | NR     | NR    | NR      | NR     | NR     | NR        | 7.58 ± 7.04   | <0.001* |
|               |       | Mild              | 84  | 29/55 (35)    |        | 44 ± 15   |         | NR     |       | NR      |        | NR     |           | 2.28 ± 1.29   |         |
| Zhou Y et al  | China | Moderate          | 140 | 55/85 (39)    | NR     | 56 ± 14   | NR      | NR     | NR    | NR      | NR     | NR     | NR        | 3.1 ± 2.41    | NR      |
|               |       | Severe            | 123 | 58/65 (47)    |        | 64 ± 14   |         | NR     |       | NR      |        | NR     |           | 11.66 ± 27.66 |         |
|               |       | Critically severe | 41  | 25/16 (61)    |        | 65 ± 13   |         | NR     |       | NR      |        | NR     |           |               |         |
| Zhu Z et al   | China | Severe            | 16  | 9/7 (56)      | 0.457  | 58 ± 12   | 0.03*   | 0 (0)  | 0.451 | 8 (50)  | 0.025* | 2 (13) | 0.348     | 5.58 ± 1.96   | 0.015*  |
|               |       | Non-severe        | 111 | 73/38 (66)    |        | 50 ± 16   |         | 10 (9) |       | 23 (21) |        | 4 (4)  |           | 2.75 ± 0.34   |         |
| Fei M et al   | China | non-critical      | 52  | 20/32 (38.46) | 0.099  | 55.7±11.9 | 0.054   | NR     | NR    | NR      | NR     | NR     | NR        | 2.66±1.93     | 0.004   |
|               |       | severe            | 20  | 12/8 (60)     |        | 64.0±16.8 |         | NR     | NR    | NR      | NR     | NR     | 6.14±4.75 |               |         |

**Table S5. The characteristics of included studies comparing survivors and non-survivors of COVID-19.**

| Table S5          |          |              |        |              |         |                          |         |          |              |          |              |                       |              |               |         |
|-------------------|----------|--------------|--------|--------------|---------|--------------------------|---------|----------|--------------|----------|--------------|-----------------------|--------------|---------------|---------|
| Author            | Country  | Groups       | Sample | M/F          | p       | Age (years)              | p       | DM       | p            | HT       | p            | CVD                   | p            | NLR           | p       |
|                   |          |              | (N)    | (male%)      |         | Mean ± SD / Median (IQR) |         | N (%)    |              | N (%)    |              | N (%)                 |              | Mean ± SD     |         |
| Abrishami A et al | Iran     | survivor     | 83     | 53/30(63.8)  | 0.04*   | 55.2±15.6                | 0.637   | 20(24.1) | 0.71         | 31(37.3) | 0.04         | 16(19.3)              | 0.34         | 3.02 ± 0.34   | 0.02    |
|                   |          | non survivor | 17     | 15/2(88.2)   |         | 57±13.2                  |         | 1(5.8)   |              | 2(11.7)  |              | 5(29.5)               |              | 5.81 ± 1.9    |         |
| Acar et al        | Turkey   | Survivor     | 129    | 42/87        | <0.05*  | 57.91                    | <0.05*  | 20       | >0.05        | 43       | <0.05*       | 9                     | >0.05        | 9.4 ± 13.85   | <0.05*  |
|                   |          | non survivor | 19     | 014/5        |         | 69.89                    |         | 6        |              | 11       |              | 2                     |              | 27.15 ± 14.71 |         |
| Asghar et al      | Pakistan | survivor     | NR     | NR           | NR      | NR                       | NR      | NR       | NR           | NR       | NR           | NR                    | NR           | 5.45 ± 5.40   | NR      |
|                   |          | non survivor | NR     | NR           | NR      | NR                       | NR      | NR       | NR           | NR       | NR           | NR                    | NR           | 12.65 ± 10.37 | NR      |
| BG et al          | India    | survivor     | 75     | 44/31        | 0.56    | 43±13.6                  | <0.001* | 17       | not reported | 19       | not reported | 5                     | not reported | 8.88 ± 3.84   | 0.004   |
|                   |          | non survivor | 25     | 013/12       |         | 59.1±11.5                |         | 19       |              | 5        |              | 5                     |              | 4.87 ± 3.7    |         |
| Chen F et al      | China    | survivor     | 577    | 297/ 280     | 0.038   | 63                       | <0.001* | 96       | 0.866        | 227      | <0.001*      | 55                    | <0.001*      | 3.38 ± 0.69   | <0.001* |
|                   |          | non survivor | 104    | 65/ 39       |         | 82                       |         | 18       |              | 66       |              | 25                    |              | 12.27 ± 2.79  |         |
| Chen L et al      | China    | Survivor     | 1651   | 781/870 (47) | <0.001* | 57 (43-66)               | <0.001* | 203 (12) | <0.001*      | 475 (29) | <0.001*      | 205 (12) <sup>s</sup> | <0.001*      | 3 ± 0.33      | <0.001* |
|                   |          | Non-survivor | 208    | 153/55 (74)  |         | 70 (63-78)               |         | 59 (28)  |              | 104 (50) |              | 62 (30) <sup>s</sup>  |              | 11 ± 2.33     |         |
| Chen R et al      | China    | Survivor     | 445    | 244/201 (55) | <0.05*  | 54 ± 14                  | <0.01*  | 41 (9)   | <0.01*       | 103 (23) | <0.01*       | 24 (5)                | >0.05        | 3.71 ± 0.87   | <0.001* |
|                   |          | Non-survivor | 103    | 69/34 (67)   |         | 67 ± 12                  |         | 20 (19)  |              | 45 (44)  |              | 11 (11)               |              | 13.45 ± 2.37  |         |
| Cheng B et al     | China    | Survivor     | 67     | 22/45 (33)   | 0.002*  | 71 ± 7                   | 0.048*  | 11 (16)  | 0.055        | 39 (58)  | 0.321        | 11 (16)               | 0.334        | 4.1 ± 2.9     | <0.001* |
|                   |          | Non-survivor | 51     | 31/20 (61)   |         | 73 ± 7                   |         | 16 (31)  |              | 25 (49)  |              | 12 (24)               |              | 13.3 ± 14.9   |         |

|                   |         |                           |     |              |        |               |             |          |       |           |         |               |               |              |              |
|-------------------|---------|---------------------------|-----|--------------|--------|---------------|-------------|----------|-------|-----------|---------|---------------|---------------|--------------|--------------|
| Goya R L et al    | Spain   | survivor                  | 465 | 317/ 148     | 0.54   | 52(44-58)     | <0.001<br>* | 49(10.5) | 0.11  | 117(25.2) | <0.001* | not re-ported | not re-ported | 4.2 ± 0.93   | <0.001*      |
|                   |         | non survivor              | 36  | 025/11       |        | 65(57-72)     |             | 7(19.4)  |       | 22(61.1)  |         | not re-ported |               | 16.9 ± 5.25  |              |
| Güneysu F et al   | Turkey  | Survivor                  | 84  | 50/34(59.5)  | 0.388  | 72.02 ± 11.39 | <0.001      | NR       | NR    | NR        | NR      | NR            | NR            | 6.43 ± 1.80  | <0.001       |
|                   |         | Non-survivor              | 85  | 45/40(52.9)  |        | 56.75 ± 19.38 |             | NR       |       | NR        |         | NR            |               | 2.88 ± 0.54  |              |
| Huang J et al     | China   | Survivor                  | 283 | 149/134 (53) | 0.318  | 53 ± 17       | <0.001<br>* | 31 (11)  | 0.103 | 63 (22)   | <0.001* | 14 (5)        | 0.011*        | 3.3 ± 4.3    | 0.013*       |
|                   |         | Non-survivor              | 16  | 11/5 (69)    |        | 69 ± 10       |             | 4 (25)   |       | 11 (69)   |         | 4 (25)        |               | 13.3 ± 14.3  |              |
| Li L et al        | China   | Survivor                  | 68  | 26/42 (38)   | 0.098  | 44 ± 13       | <0.01*      | 6 (9)    | 0.158 | 0 (0)     | NR      | 0 (0)         | NR            | 2.3 ± 0.55   | <0.0001<br>* |
|                   |         | Non-survivor              | 25  | 15/10 (60)   |        | 69 ± 11       |             | 5 (20)   |       | 5 (20)    |         | 4 (16)        |               | 4.25 ± 0.95  |              |
| Luo X et al       | China   | Survivor                  | 214 | 99/115 (46)  | 0.025* | 51 (37-63)    | <0.001<br>* | 27 (13)  | 0.056 | 37 (17)   | <0.001* | 13 (6)        | 0.010*        | 2.96 ± 0.41  | <0.001*      |
|                   |         | Non-survivor              | 84  | 51/33 (61)   |        | 71 (64-80)    |             | 18 (21)  |       | 49 (58)   |         | 13 (16)       |               | 8.17 ± 0.79  |              |
|                   |         | non survivor              | 43  | 31/12 (72.0) |        | 63.81         |             | 21       |       | NR        |         |               |               |              |              |
| Sanchez A et al   | Mexico  | Survivor                  | 111 | 74/37(67)    | 0.162  | 51            | 0.019       | 37(33.3) | 0.111 | 45(45.1)  | 0.072   | 24(22.1)      | 0.706         | 8.31 ± 1.47  | 0.001        |
|                   |         | Non-survivor              | 83  | 63/20 (76)   |        | 62            |             | 37(44.6) |       | 49(59.4)  |         | 16(19.1)      |               | 17.66 ± 2.71 |              |
| Sepulchre E et al | Belgium | Survivor                  | 138 |              | 0.01   | 60(47-74)     | 0.013       | 26.28    | 0.22  | 37.68     | 0.105   | 18.12         | 0.17          | 4 ± 0.33     | <0.0001      |
|                   |         | Non-survivor              | 60  | 115/83(58)   |        | 66.5(57-76)   |             | 18.33    |       | 50        |         | 26.67         |               | 7 ± 1.75     |              |
| Ullah             | USA     | NLR < 10                  | 141 | 66 (80.50%)  | 0.04   | 63.6          | 0.65        | 49 (35)  | 0.716 | 93 (66)   | 0.16    | 27 (19)       | 0.65          | NR           | NR           |
|                   |         | NLR > 11                  | 26  | 16 (19.50%)  |        | 61.6          |             | 10 (39)  |       | 14 (54)   |         | 2 (8)         |               | NR           |              |
| Tatum             | USA     | NLR ≤ 4.94                | 62  |              | 0.454  | 56.1 ± 15.2   | 0.060       | NR       | NR    | NR        | NR      | NR            | NR            | NR           | NR           |
|                   |         | NLR > 4.94                | 57  | 57/68 (21.6) |        | 62.1 ± 14.1   |             | NR       |       | NR        |         | NR            |               | NR           |              |
| Liu Y             | China   | NLR Tertile 1 (0.54–2.21) | 82  | 24 (29)      | NR     | 48 ± 16       | <0.001      | 5 (6)    | 0.131 | 11 (13)   | 0.005   | 5 (6)         | 0.100         | NR           | NR           |

|               |        |                            |     |              |        |               |        |           |        |          |         |          |         |              |         |
|---------------|--------|----------------------------|-----|--------------|--------|---------------|--------|-----------|--------|----------|---------|----------|---------|--------------|---------|
|               |        | NLR Tertile 2 (2.21–4.82)  | 81  | 40 (49)      |        | 53 ± 17       |        | 6 (7)     |        | 14 (17)  |         | 3 (4)    |         | NR           |         |
|               |        | NLR Tertile 3 (4.85–88.09) | 82  | 50 (61)      |        | 61 ± 15       |        | 12 (15)   |        | 27 (33)  |         | 10 (12)  |         | NR           |         |
| Wang X et al  | China  | survivor                   | 119 | 49/ 70       | 0.251  | 63.5          | <0.001 | 25        |        | 47       |         | 12       |         | 1.95 ± 0.19  | <0.001* |
|               |        | non survivor               | 12  | 7/-5         |        | 80            |        | 3         |        | 5        |         | 2        |         | 15.01 ± 5.01 |         |
|               |        | Moderate                   | 26  | 15/11        |        | 57.96 ± 14.51 |        | 3         |        | 0.719    |         | 3        |         | 0.617        |         |
| Yan X et al   | China  | Survivor                   | 964 | 466/498 (48) | 0.018* | 62 (50-70)    | 0.007* | 97 (11)   | 0.003* | 215 (22) | <0.001* | 65 (7)   | <0.001* | 4.11 ± 0.94  | <0.001* |
|               |        |                            |     |              |        |               |        |           |        |          |         |          |         | 49.06 ±      |         |
|               |        | Non-survivor               | 40  | 27/13 (68)   |        | 68 (58-79)    |        | 10 (25)   |        | 20 (50)  |         | 10 (25)  |         | 10.99        |         |
| Yang Q et al  | China  | Survivor                   | 176 | 82/94 (47)   | 0.077  | 50 ± 15       | <0.001 | 28 (16)   | 0.008* | 47 (27)  | <0.001* | 6 (3)    | 0.010*  | 2.98 ± 0.63  | <0.001* |
|               |        | Non-survivor               | 50  | 31/19 (62)   |        | 68 ± 16       |        | 17 (34)   |        | 37 (74)  |         | 7 (14)   |         | 6.18 ± 2.3   |         |
| Yavuz B et al | Turkey | survivor                   | 91  | 56/35(61.5)  | 0.166  | 70.1 ±7.9     | 0.084  | 38(41.8 ) | 0.48   | 52(57.1) | 0.545   | 14(15.4) | 0.837   | 4.5 ±4.6     | 0.002   |
|               |        | non survivor               | 22  | 17/5(77.3)   |        | 73.1 ±7.6     |        | 11(50)    |        | 11(50)   |         | 3(13.6)  |         | 9.9 ±10.5    |         |
| Ye W et al    | China  | Survivor                   | 297 | 137/160 (46) | 0.002* | 60 (50-67)    | <0.001 | 41 (14)   | 0.004* | 73 (25)  | <0.001* | 5 (2)    | <0.001* | 2.88 ± 0.82  | <0.001* |
|               |        | Non-survivor               | 52  | 36/16 (69)   |        | 69 (63-76)    |        | 16 (31)   |        | 30 (58)  |         | 11 (21)  |         | 14.96 ± 4.51 |         |
| Zhang N et al | China  | Survivor                   | 50  | 36/14 (72)   | NR     | 63 ± 11       | 0.044* | 5 (10)    | 0.025* | 18 (36)  | 0.811   | 11 (22)  | 0.587   | 8.4 ± 7.5    | 0.030*  |
|               |        | Non-survivor               | 10  | 7/3 (70)     |        | 71 ± 9        |        | 4 (40)    |        | 4 (40)   |         | 3 (30)   |         | 18.7 ± 16.6  |         |
| Zhang S et al | China  | Survivor                   | 420 | 213/207 (51) | NR     | 59 (48-67)    | NR     | 60 (14)   | NR     | 107 (26) | NR      | 53 (13)  | NR      | 3.91 ± 0.78  | <0.001* |
|               |        | Non-survivor               | 96  | 72/24 (75)   |        | 67 (61-74)    |        | 16 (17)   |        | 31 (32)  |         | 14 (15)  |         | 10.99 ± 2.21 |         |

**Table S6. Risk of bias assessment of all included studies using the Newcastle-Ottawa Scale (NOS).**

| Table S5          |                     |                |           |               |                  |           |
|-------------------|---------------------|----------------|-----------|---------------|------------------|-----------|
| Author            | Year of Publication | Study Location | Selection | Comparability | Outcome/Exposure | NOS SCORE |
| Abrishami A et al | 2021                | Iran           | ***       | *             | ***              | 7         |
| Acar et al        | 2021                | Turkey         | ***       | *             | ***              | 7         |
| Asgar M et al     | 2020                | Pakistan       | ***       | *             | ***              | 7         |
| Bastug A et al    | 2020                | Turkey         | ***       | *             | ***              | 7         |
| BG et al          | 2021                | India          | ***       | *             | ***              | 7         |
| Chen F et al      | 2020                | China          | ***       | *             | ***              | 7         |
| Chen L et al      | 2020                | China          | *****     | **            | ***              | 9         |
| Chen R et al      | 2020                | China          | *****     | **            | ***              | 9         |
| Cheng B et al     | 2020                | China          | ***       | **            | ***              | 8         |
| Ding X et al      | 2020                | China          | **        | **            | ***              | 8         |
| Fei M et al       | 2020                | China          | **        | *             | ***              | 5         |
| Fu J et al        | 2020                | China          | **        | *             | ***              | 6         |
| Gong J et al      | 2020                | China          | ***       | *             | ***              | 7         |
| Goya R L et al    | 2020                | Spain          | **        | *             | ***              | 6         |
| Guner R et al     | 2020                | Turkey         | **        | *             | ***              | 6         |
| Güneysu F et al   | 2020                | Turkey         | ***       | *             | ***              | 7         |

|                     |      |              |     |    |     |   |
|---------------------|------|--------------|-----|----|-----|---|
| Hammad R et al      | 2021 | Egypt        | *** | *  | *** | 7 |
| Hu H et al          | 2020 | China        | **  | *  | *** | 6 |
| Huang J et al       | 2020 | China        | *** | ** | *** | 8 |
| Kazancioglu S et al | 2020 | Turkey       | *** | ** | *** | 8 |
| Kong M et al        | 2020 | China        | **  | ** | *** | 7 |
| Li L et al          | 2020 | China        | *** | *  | *** | 7 |
| Liao D et al        | 2020 | China        | **  | ** | *** | 7 |
| Lin S et al         | 2020 | China        | *** | *  | *** | 7 |
| Liu F et al         | 2020 | China        | *** | ** | *** | 8 |
| Liu J et al         | 2020 | China        | **  | ** | *** | 7 |
| Liu YP et al        | 2020 | China        | *** | ** | *** | 8 |
| Liu Y et al         | 2020 | China        | *** | *  | *** | 7 |
| Luo X et al         | 2020 | China        | *** | ** | *** | 8 |
| Ma Y et al          | 2020 | China        | **  | ** | **  | 6 |
| Ok F et al          | 2020 | Turkey       | **  | ** | *** | 7 |
| Qin C et al         | 2020 | China        | **  | -  | *** | 5 |
| Ramesh J et al      | 2021 | India        | *** | ** | *** | 8 |
| Sanchez A et al     | 2020 | Mexico       | *** | *  | *** | 6 |
| Sayah W et al       | 2021 | Algeria      | *** | ** | *** | 8 |
| Sayed A et al       | 2021 | Saudi Arabia | *** | *  | *** | 7 |

|                   |      |         |     |    |     |   |
|-------------------|------|---------|-----|----|-----|---|
| Seo J et al       | 2021 | Korea   | *** | *  | *** | 7 |
| Sepulchre E at al | 2020 | Belgium | *** | *  | *** | 7 |
| Shang W et al     | 2020 | China   | **  | ** | *** | 7 |
| Shi S et al       | 2021 | China   | *** | *  | **  | 6 |
| Sun S et al       | 2020 | China   | **  | -  | *** | 5 |
| Ullah W et al     | 2020 | USA     | **  | *  | *** | 6 |
| Wang C et al      | 2020 | China   | *** | *  | *** | 7 |
| Wang F et al      | 2020 | China   | *** | ** | *** | 8 |
| Wang K et al      | 2021 | China   | *** | *  | *** | 7 |
| Wang W et al      | 2021 | China   | *** | *  | *** | 7 |
| Wang X et al      | 2020 | China   | *** | *  | *** | 7 |
| Wu S et al        | 2020 | China   | **  | ** | *** | 7 |
| Xia X et al       | 2020 | China   | **  | ** | *** | 8 |
| Xie G et al       | 2020 | China   | **  | -  | *** | 5 |
| Xie L et al       | 2020 | China   | **  | -  | *** | 5 |
| Xu J et           | 2020 | China   | **  | -  | *** | 5 |
| Xue G et al       | 2020 | China   | *** | *  | *** | 7 |
| Yan X et al       | 2020 | China   | *** | ** | *** | 8 |
| Yang AP et al     | 2020 | China   | **  | ** | *** | 7 |
| Yang Q et al      | 2020 | China   | *** | ** | *** | 8 |

---

|               |      |        |     |    |     |   |
|---------------|------|--------|-----|----|-----|---|
| Yavuz B et al | 2021 | Turkey | *** | ** | *** | 9 |
| Ye W et al    | 2020 | China  | *** | ** | *** | 8 |
| Zhang N et al | 2020 | China  | *** | -  | *** | 6 |
| Zhang S et al | 2020 | China  | *** | *  | *** | 7 |
| Zhang Y et al | 2020 | China  | **  | ** | *** | 7 |
| Zhou Y et al  | 2020 | China  | **  | -  | *** | 5 |
| Zhu Z et al   | 2020 | China  | **  | ** | *** | 7 |

**Figure S1A: Forest plot of studies comparing severe disease with non-severe disease stratified by severity criteria**

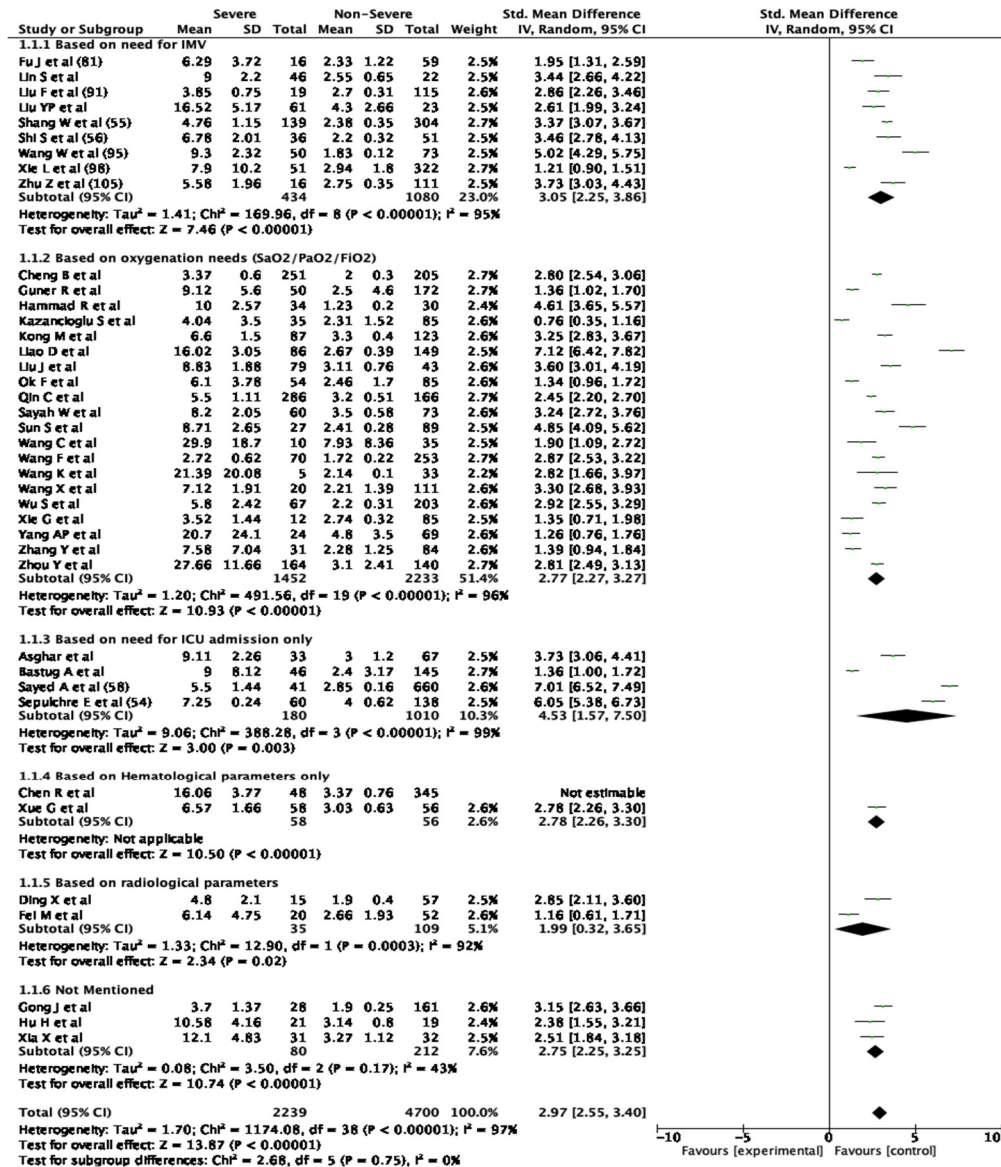

**Figure S1B: Forest plot of studies comparing severe disease with non-severe disease stratified by region**

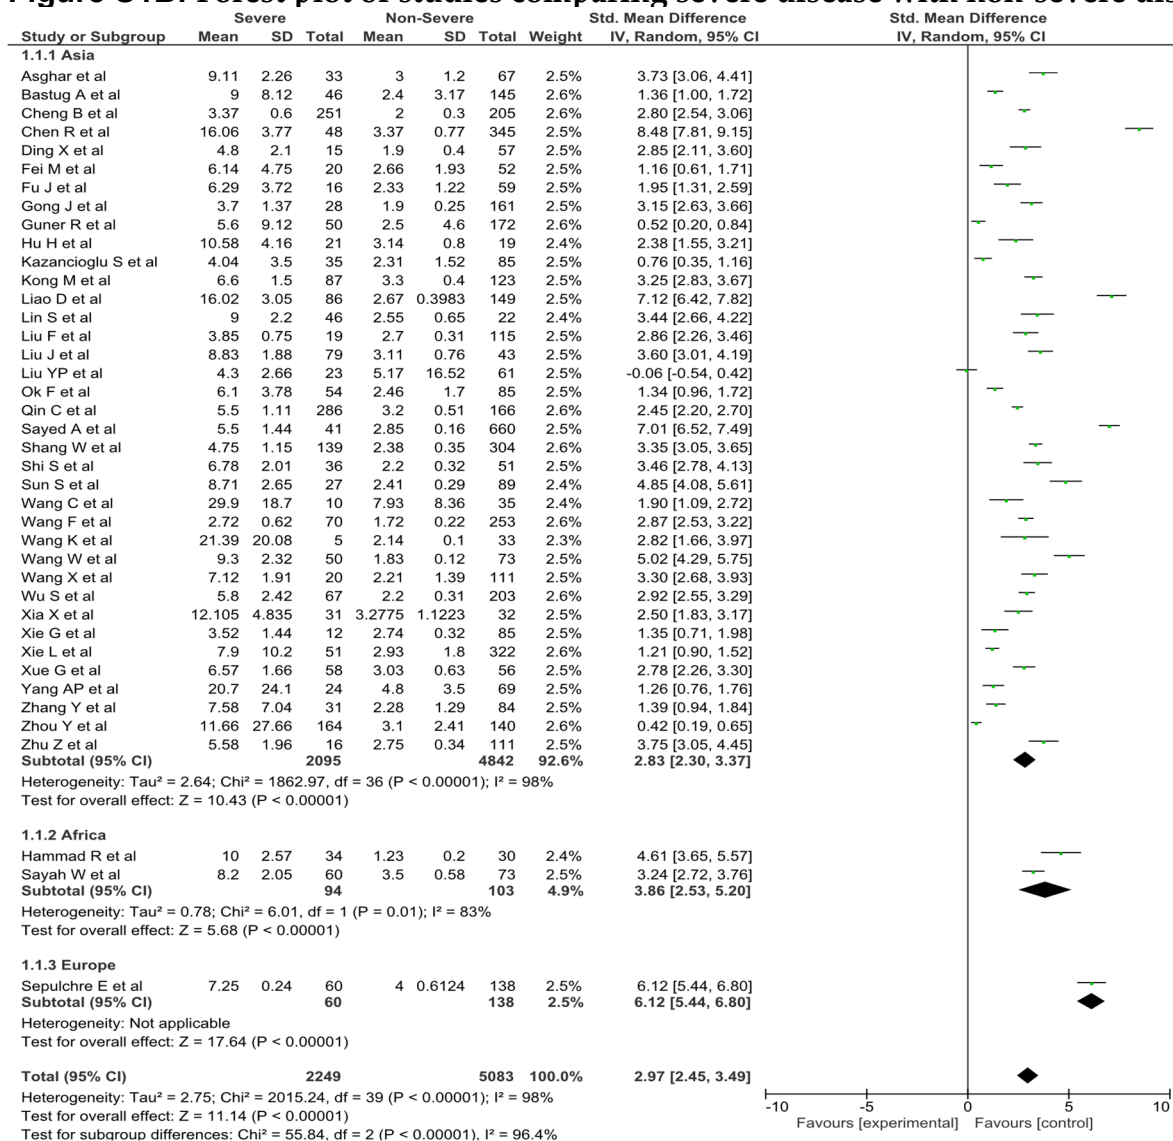

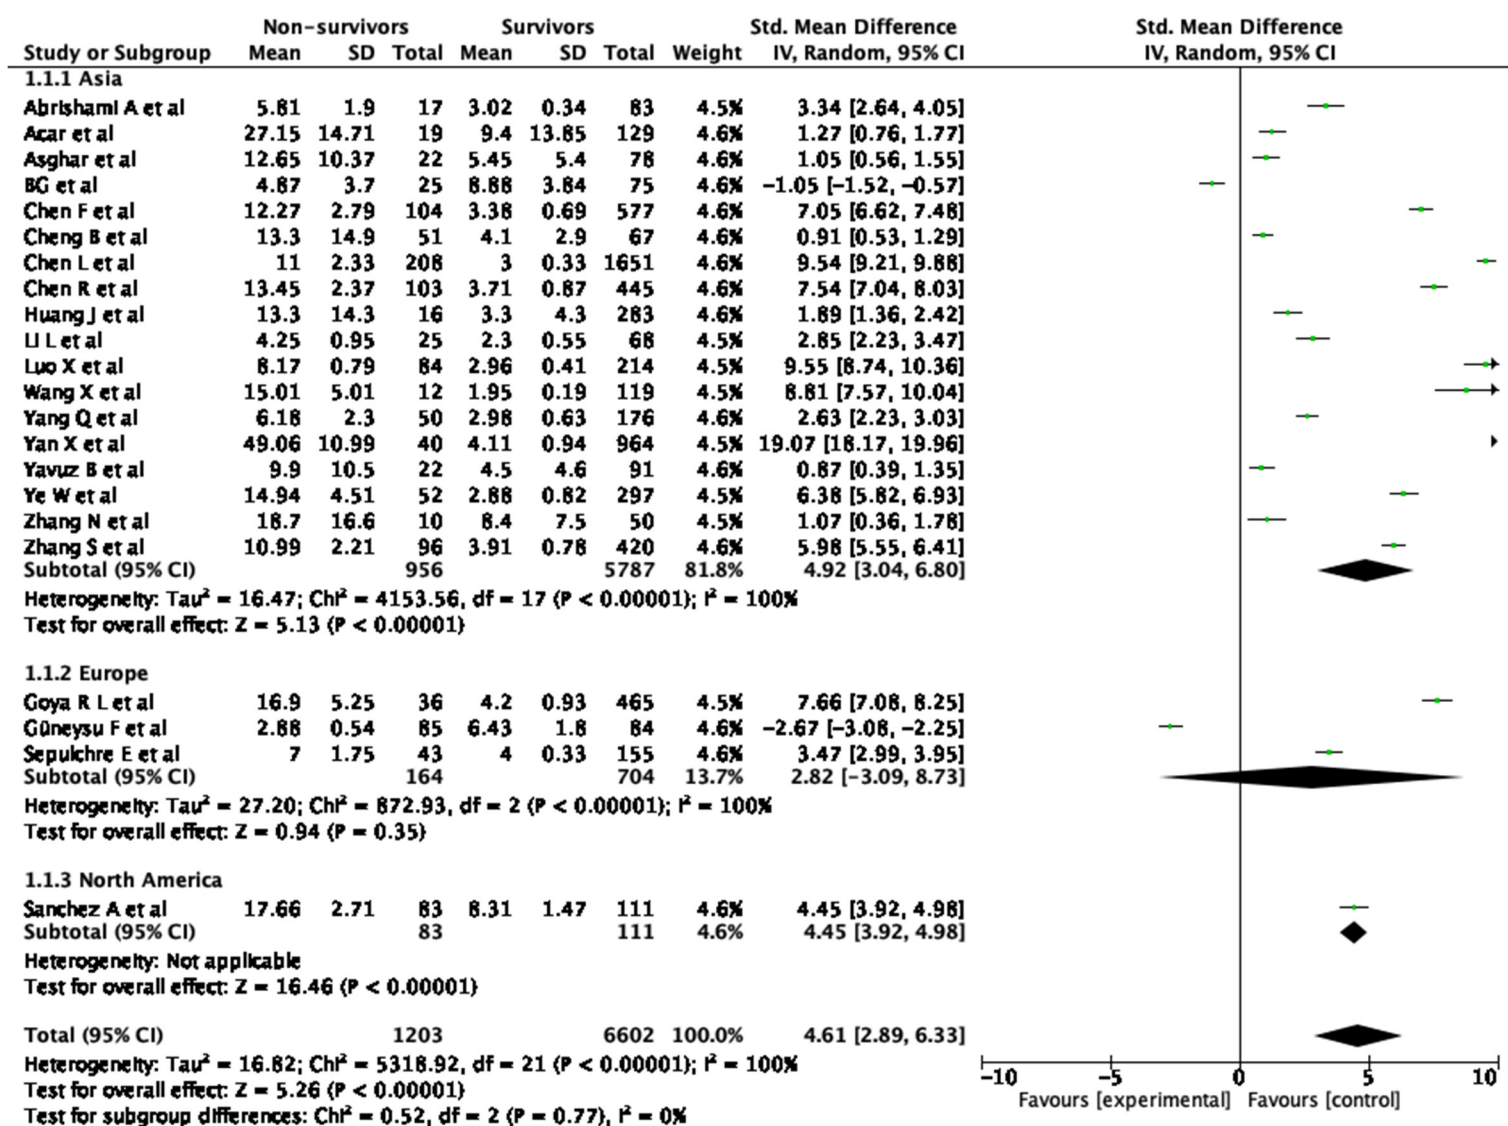

**Figure S2:** Forest plot of studies comparing non-survivors with survivors, stratified by region

Figure S3 A: Forest plot of the sensitivity and specificity and DOR of NLR for predicting disease severity in patients with COVID-19.

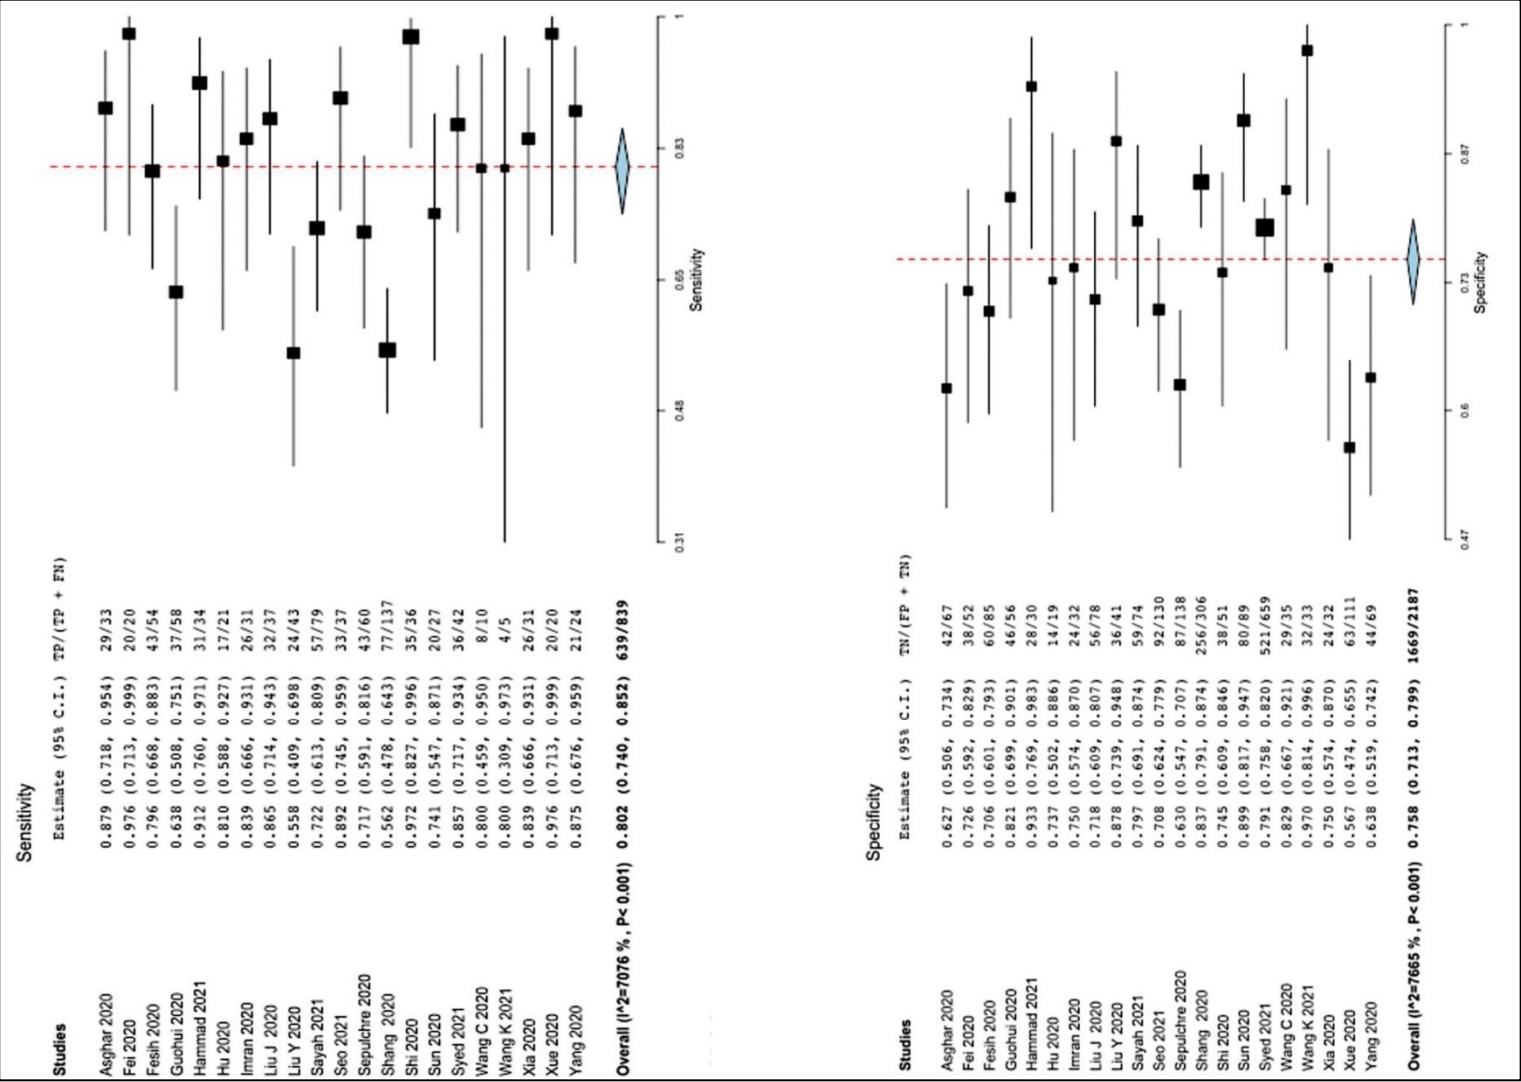

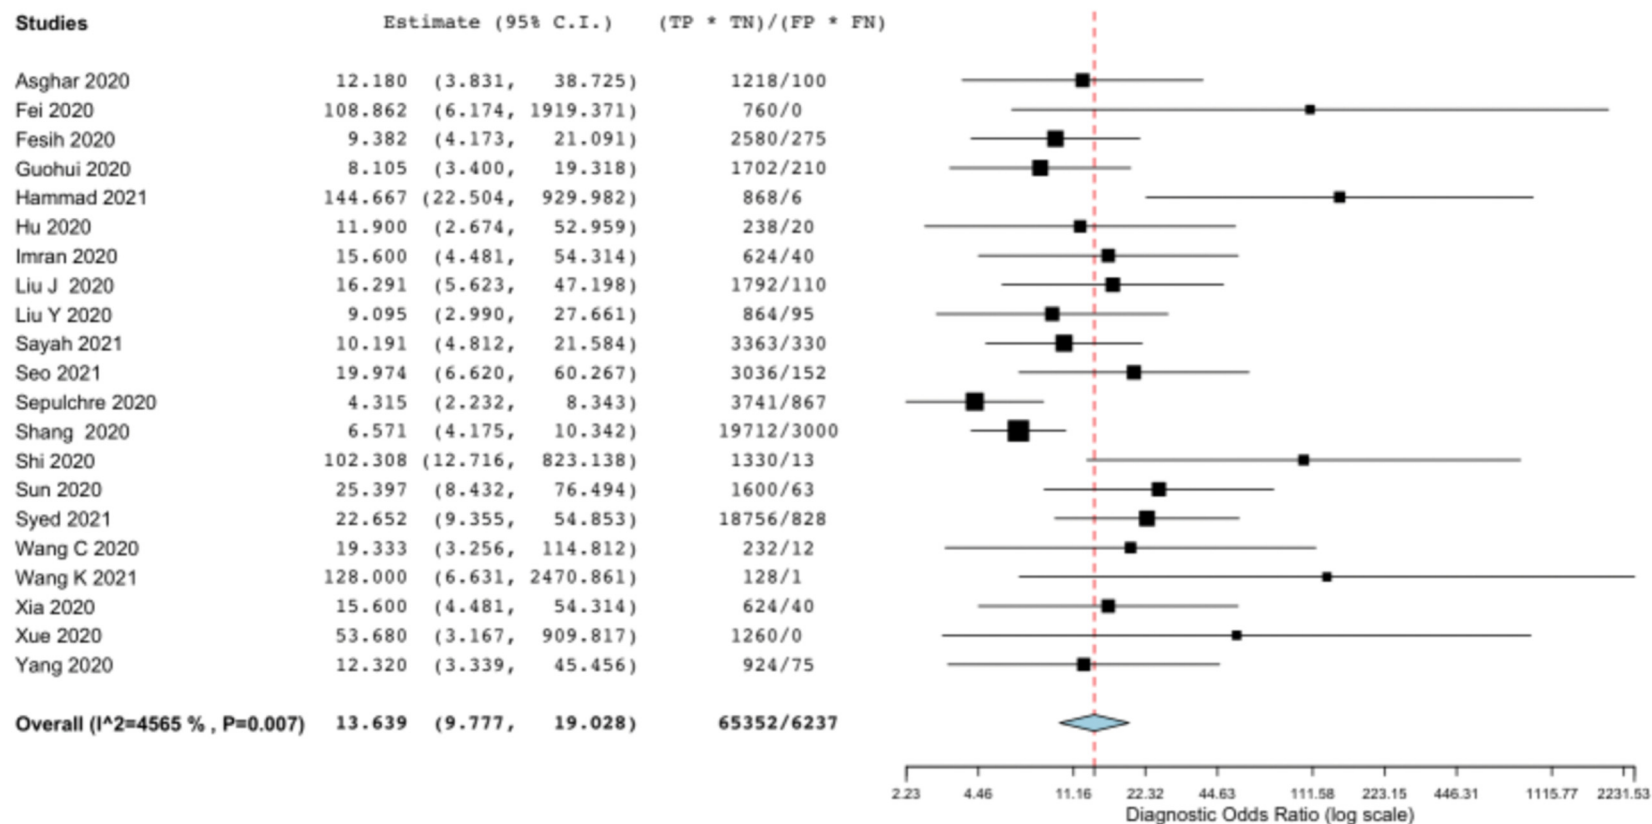

Forest plot of the odds of NLR for predicting disease severity in patients with COVID-19. The pooled OR was 13.639 (95% CI: 9.777 – 19.028).

Figure S3 B: Forest plot of the sensitivity and specificity and DOR of NLR for predicting disease mortality in patients with COVID-19.

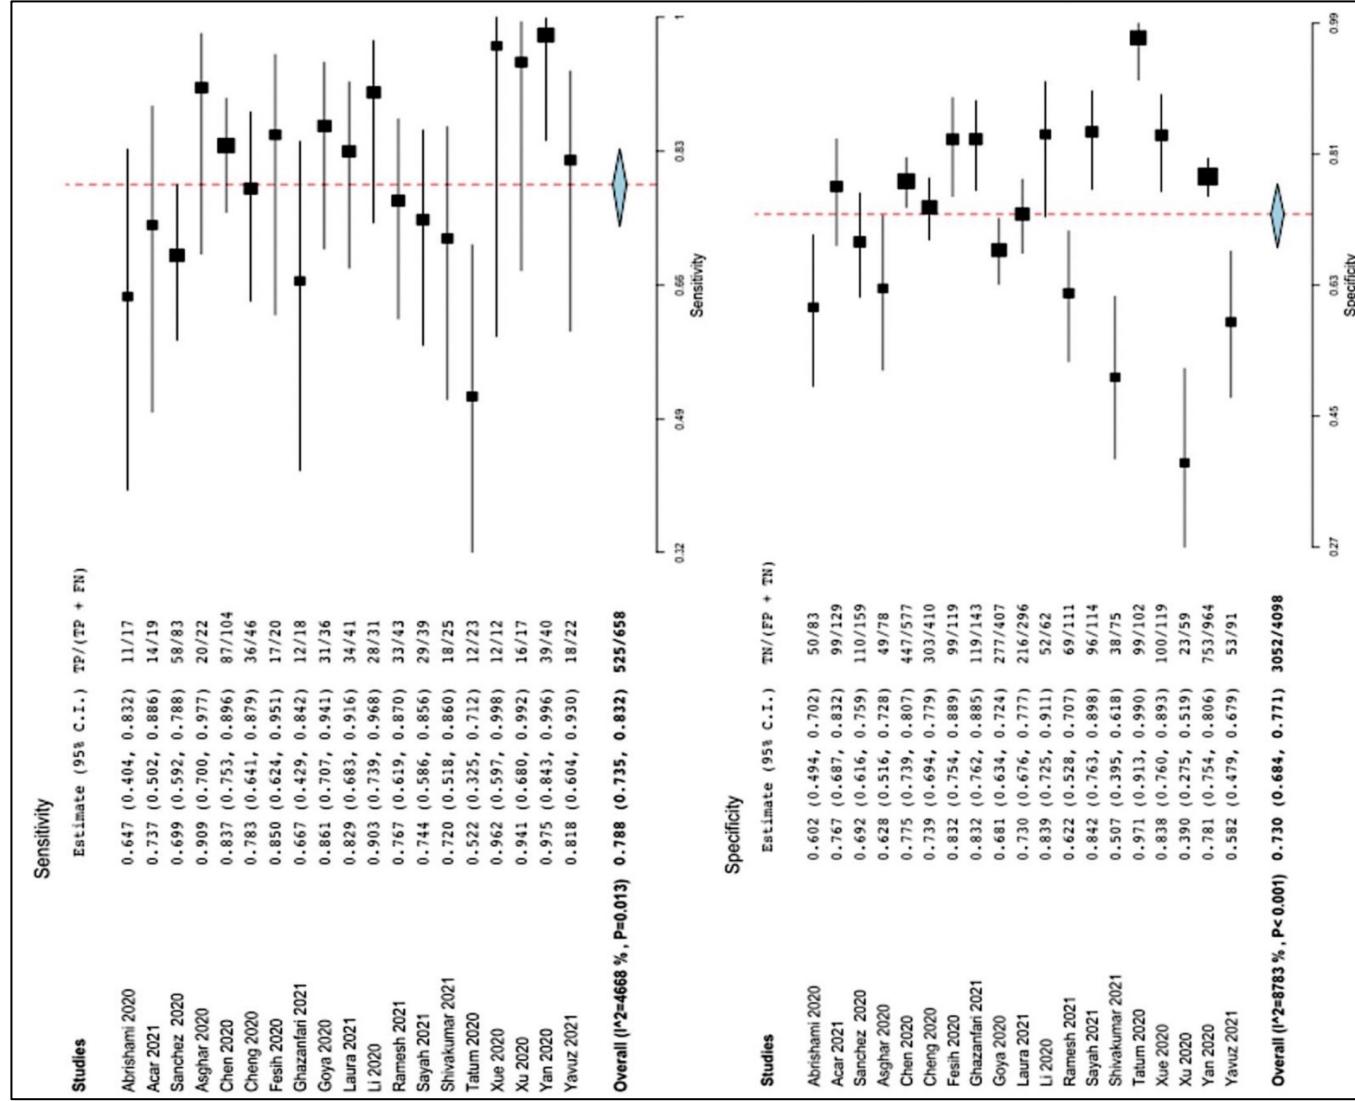

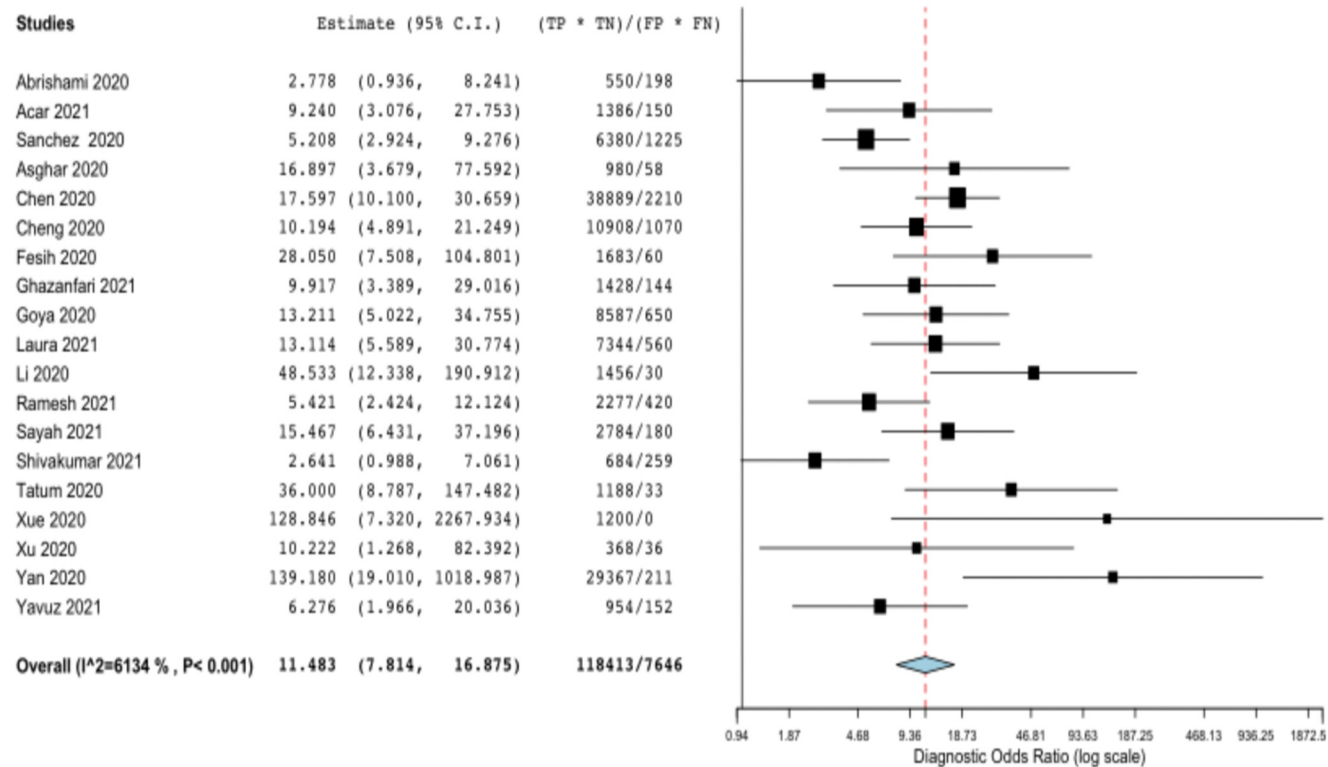

**Forest plot of odds of NLR for predicting disease mortality in patients with COVID-19. The pooled OR was 11.483 (95% CI: 7.814 – 16.875).**

**Figure S4 A: Forest plot showing sensitivity of NLR for predicting disease severity in patients with COVID-19**

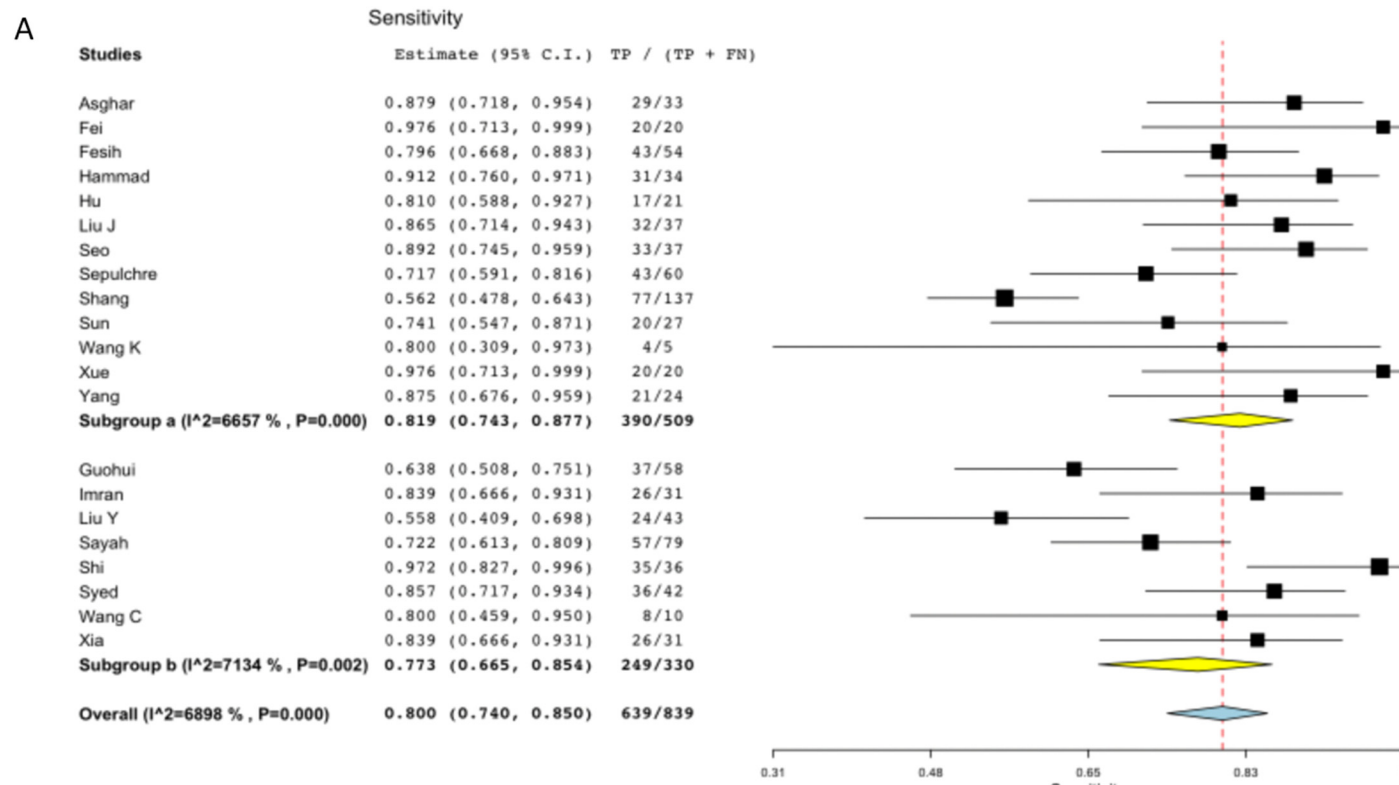

**S4A: Forest plot showing sensitivity of NLR for predicting severity in patients with COVID-19**

**Subgroup a Cut-off <4.5**

**Subgroup b Cutoff >4.5**

**Cut-off calculation from the median value of NLR cut-off from our review**

Figure S4 B: Forest plot showing specificity of NLR for predicting disease severity in patients with COVID-19

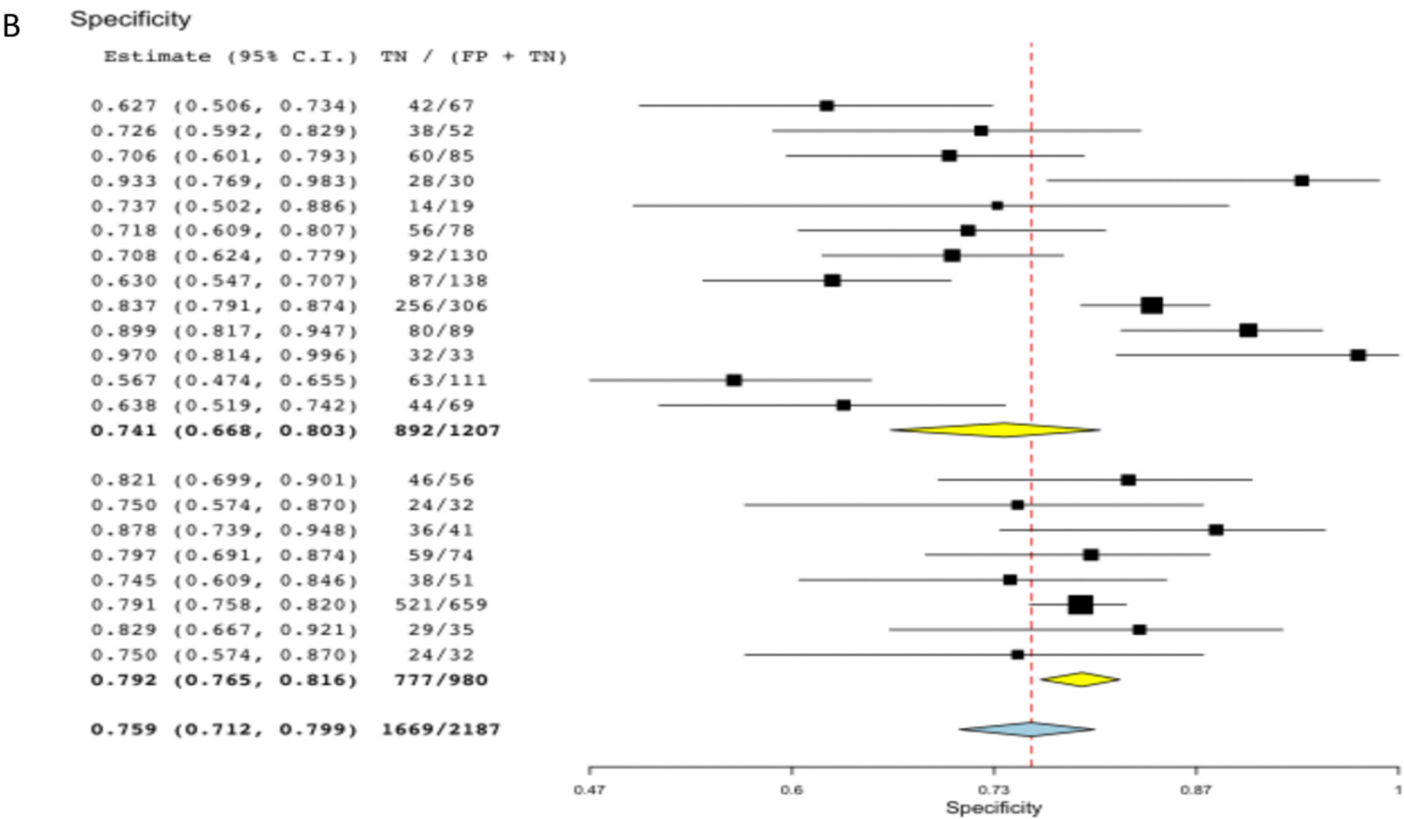

S4B: Forest plot showing specificity of NLR for predicting severity in patients with COVID-19  
Subgroup a Cut-off <4.5  
Subgroup b Cutoff >4.5  
Cut-off calculation from the median value of NLR cut-off from our review

Figure S5: Forest plot showing diagnostic odds ratio (DOR) of NLR for predicting disease severity in patients with COVID-19.

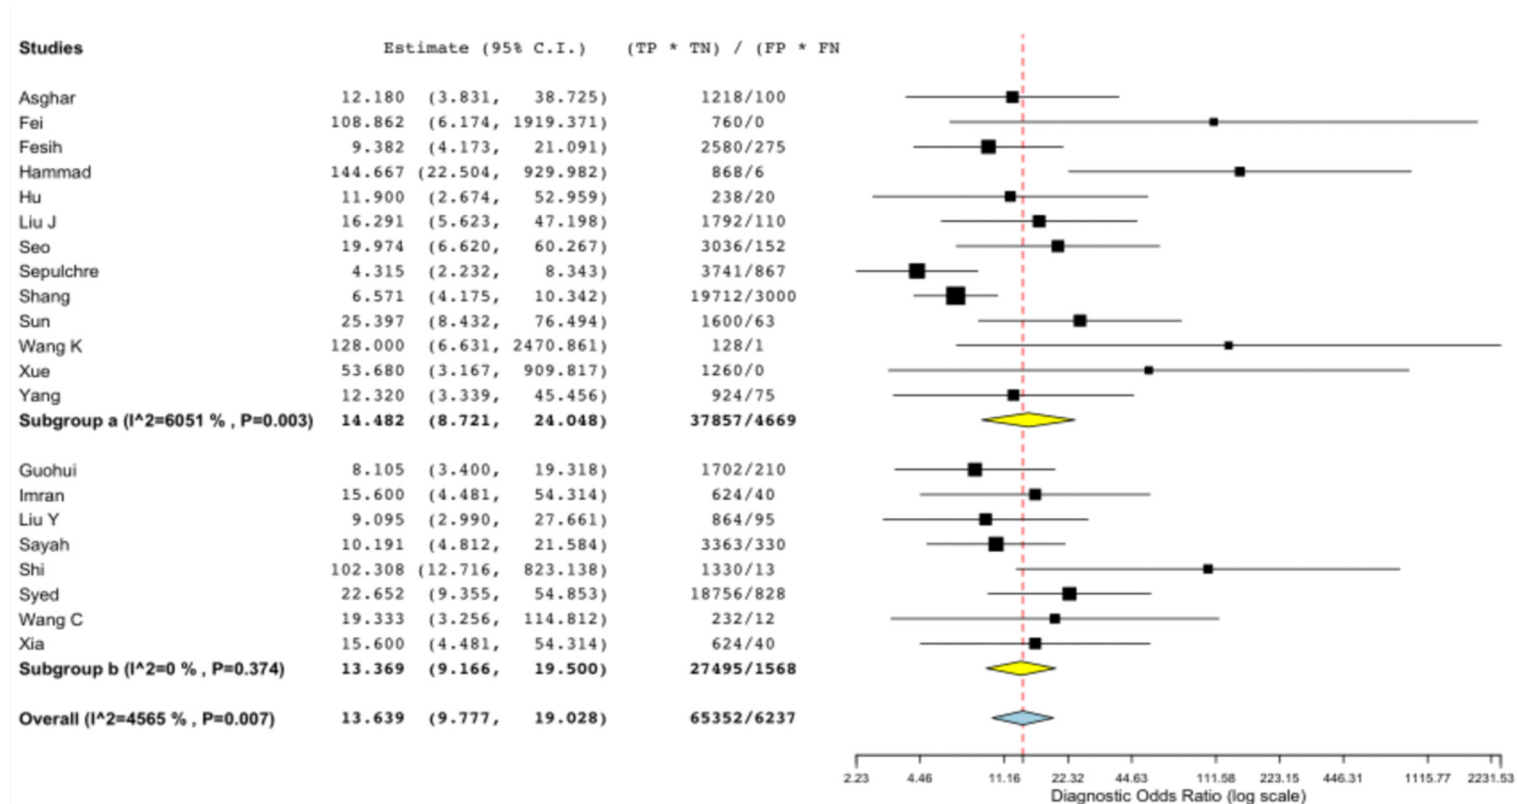

S5: Forest plot showing the diagnostic odds ratio (DOR) of NLR for predicting severity in patients with COVID-19

Subgroup a Cut-off <4.5

Subgroup b Cutoff >4.5

Cut-off calculation from the median value of NLR cut-off from our review

**Figure S6: Forest plot showing sensitivity and specificity of NLR for predicting disease Mortality in patients with COVID-19**

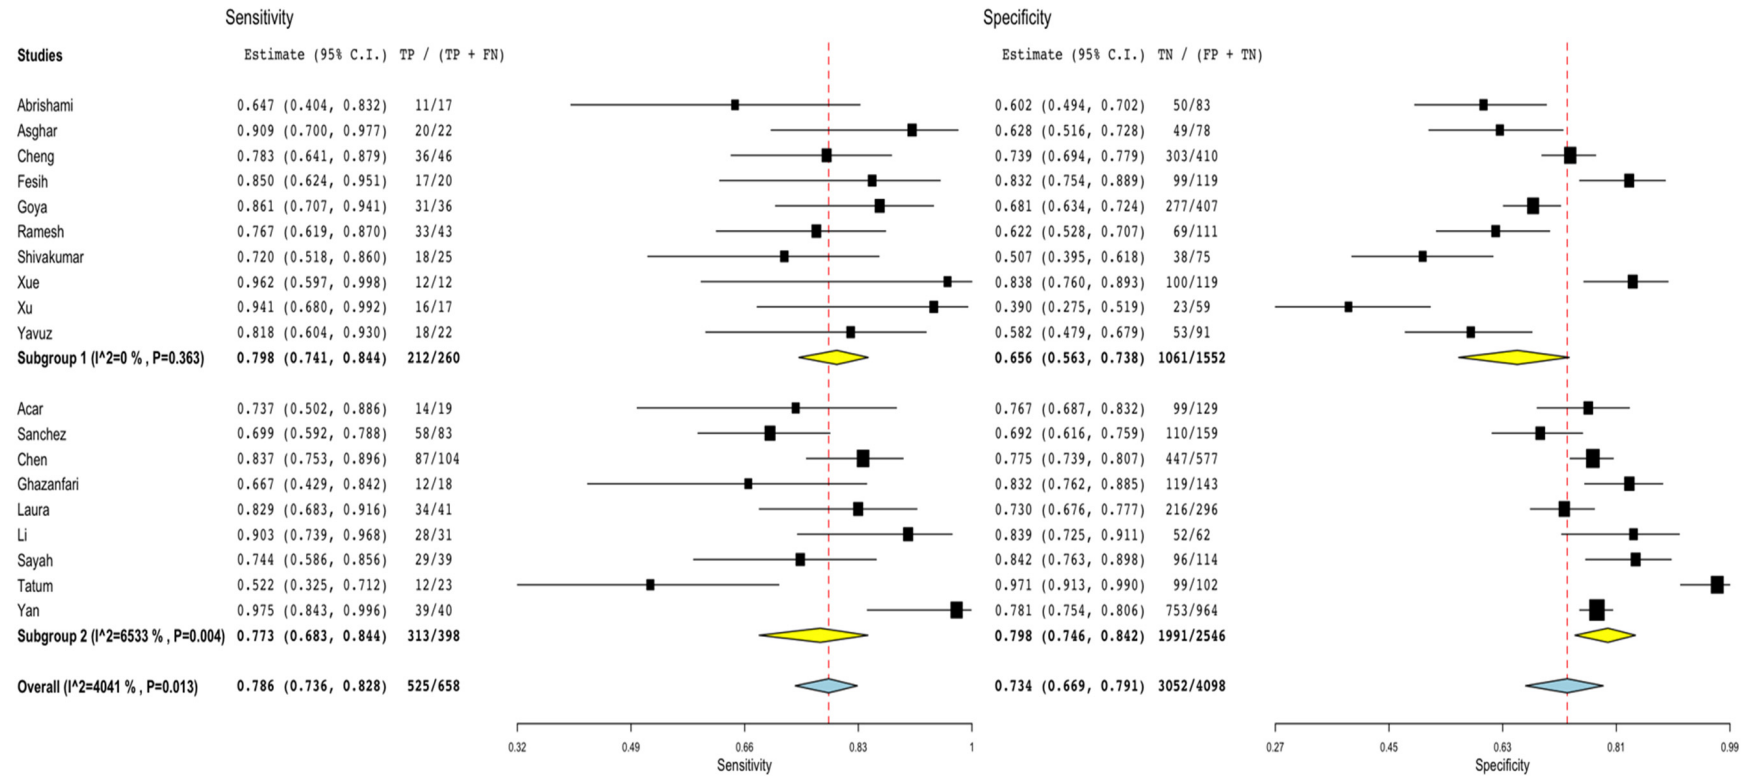

**S6: Forest plot showing sensitivity and specificity of NLR for predicting mortality in patients with COVID-19**

**Subgroup a Cut-off <6.5**

**Subgroup b Cutoff >6.5**

**Cut-off calculation from the median value of NLR cut-off from our review**

**Figure S7: Forest plot showing sensitivity and specificity of NLR for predicting disease Mortality in patients with COVID-19.**

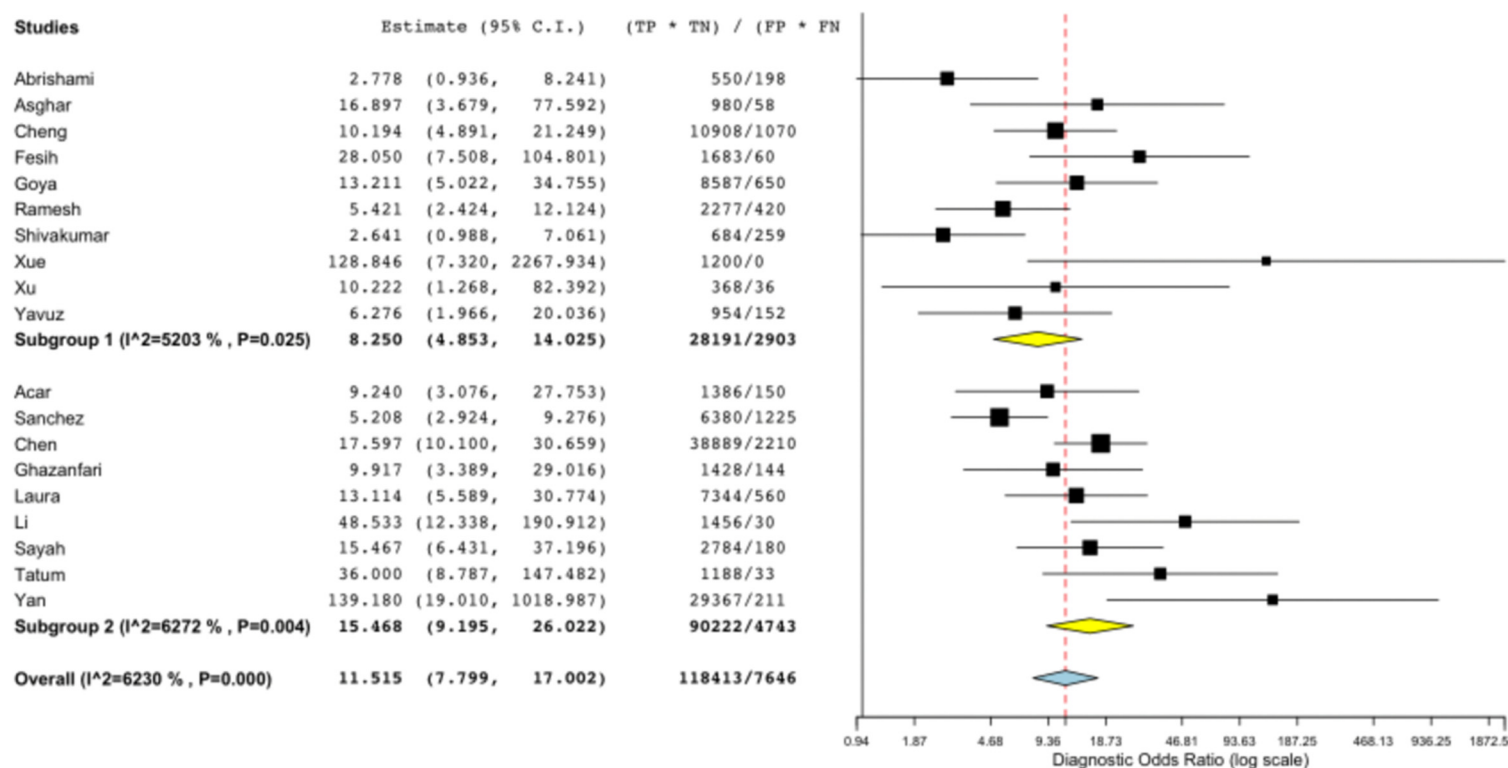

S6: Forest plot showing sensitivity and specificity of NLR for predicting mortality in patients with COVID-19

Subgroup a Cut-off <4.5

Subgroup b Cut-off >4.5

Cut-off calculation from the median value of NLR cut-off from our review

**Fig S8: Forest Plot using the random-effects model showing the association between NLR value on admission and all-cause mortality risk.**

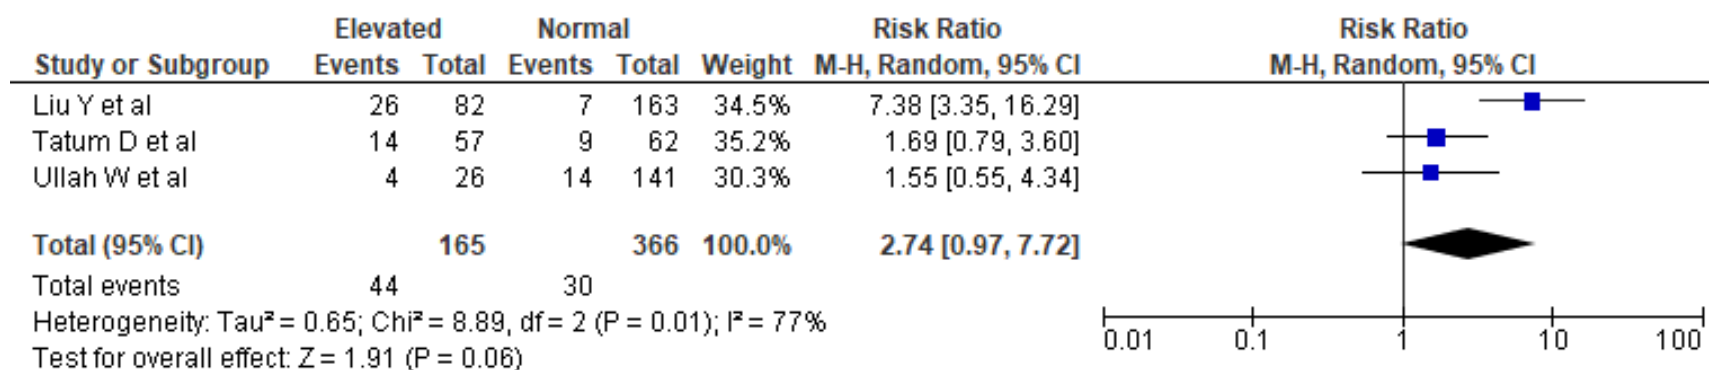

**Figure S9: Bubble plot for meta-regression in studies with severity outcome.**

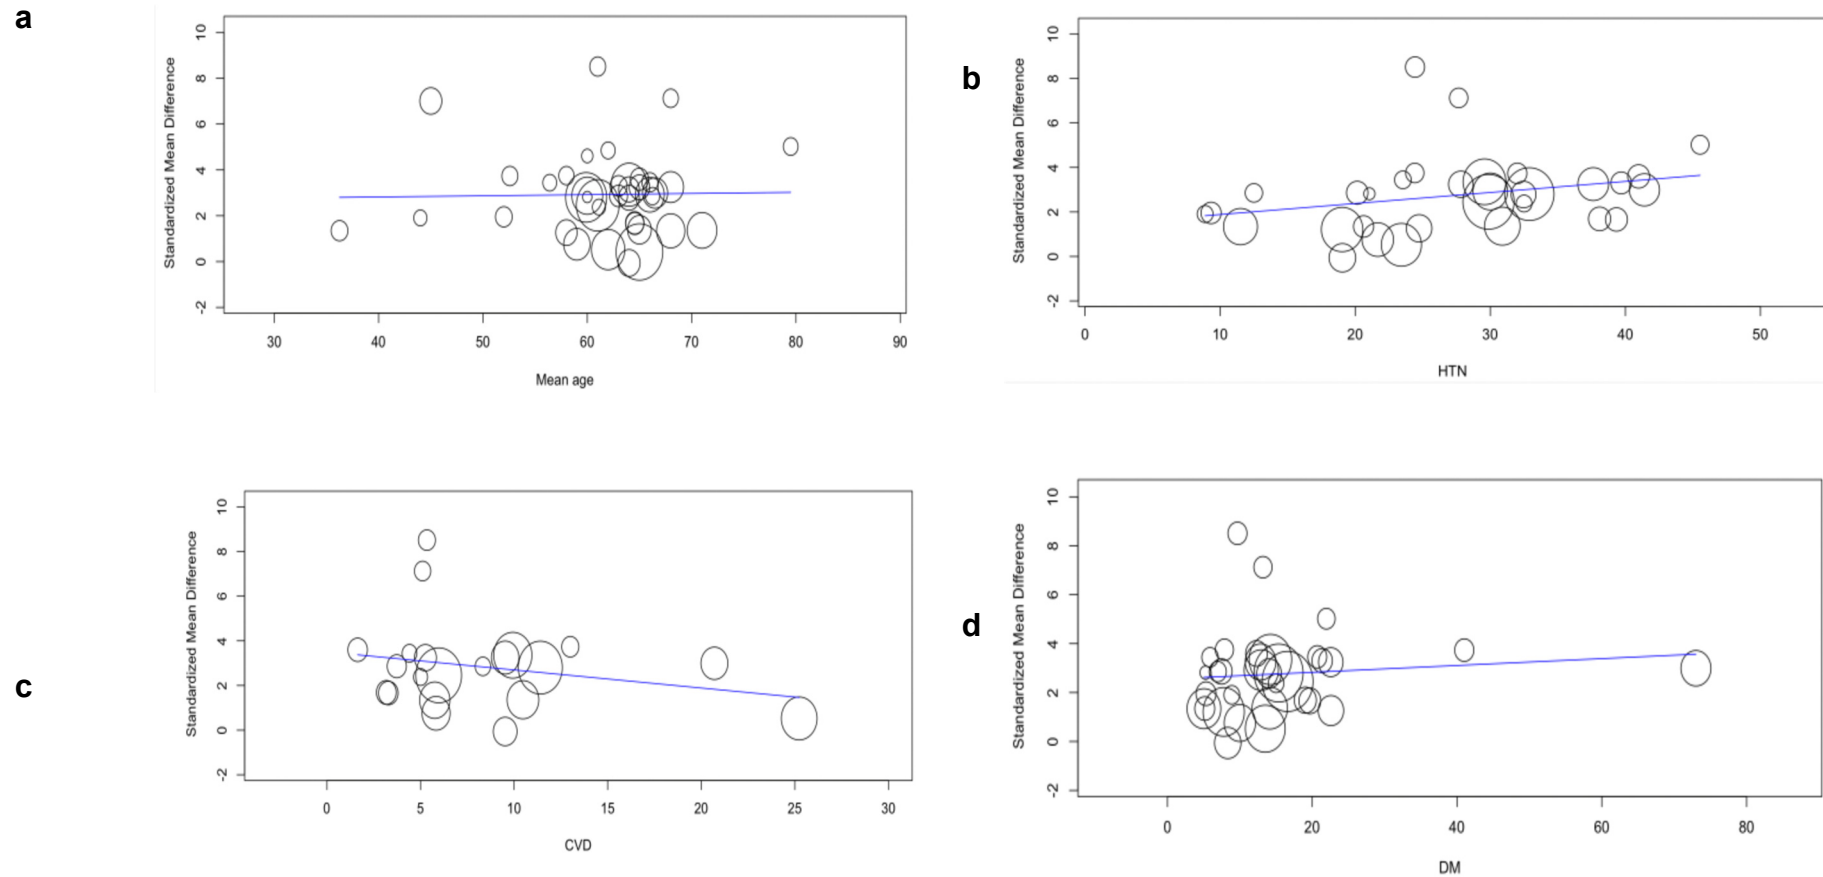

**Bubble plot for meta-regression in studies with severity outcome. The association between NLR values on admission and COVID-19 severity was not affected by age (A), Hypertension(B), CVD (C), and Diabetes Meletus(D).**

**Figure S10: Bubble plot for meta-regression in studies with mortality outcome**

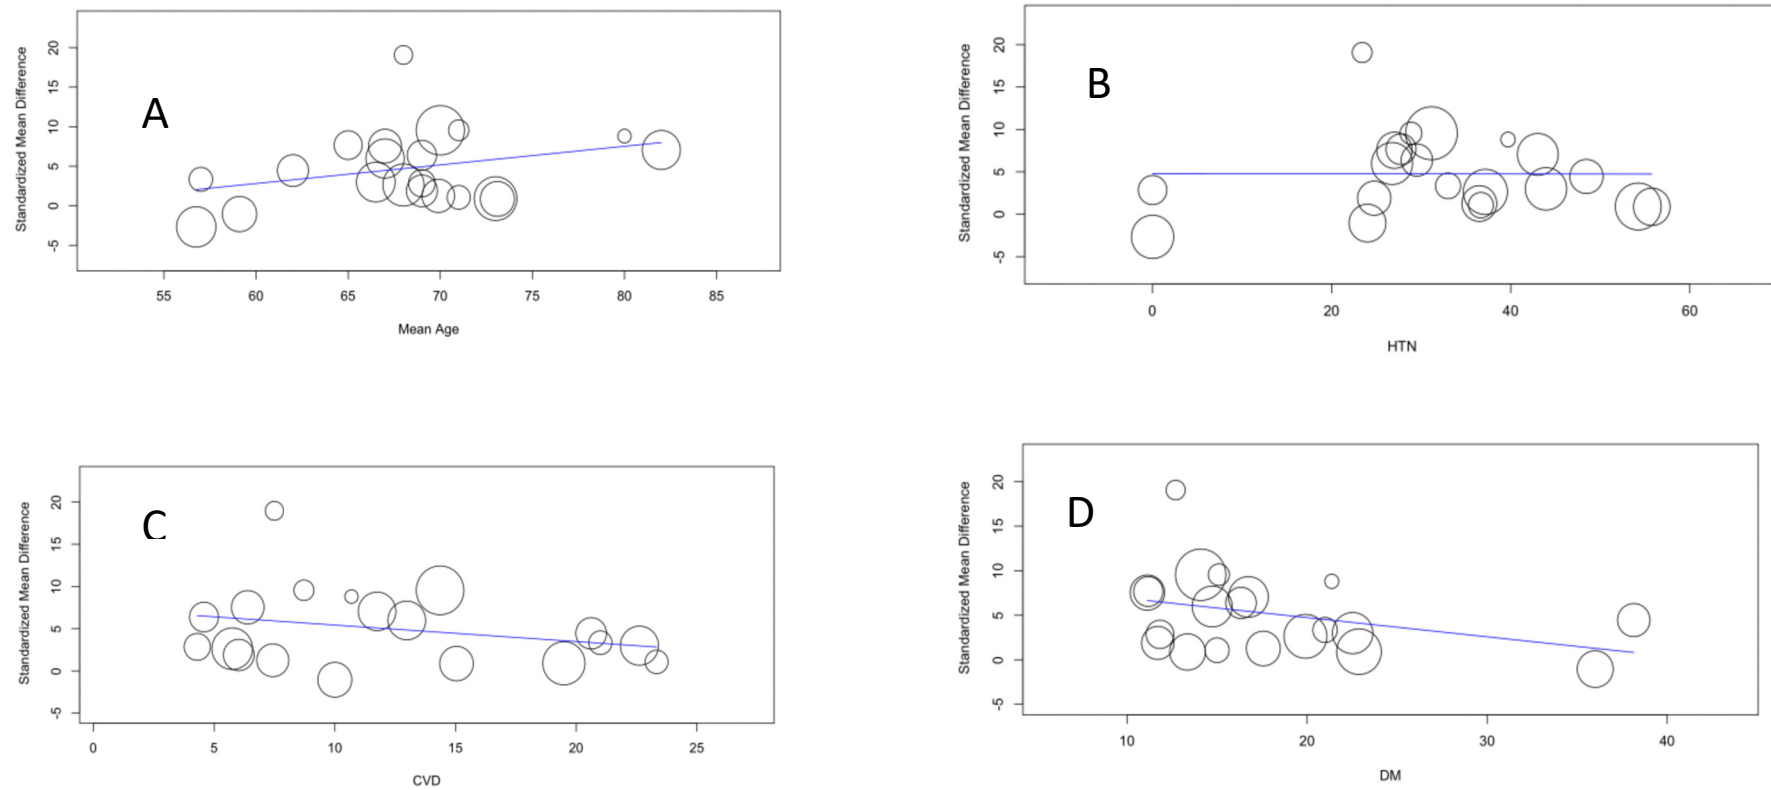

**Bubble plot for meta-regression in studies with mortality outcome. The association between NLR values on admission and COVID-19 mortality was not affected by age (A), Hypertension(B), CVD (C), and Diabetes Meletus(D).**

**Figure S11: Forest plot of studies comparing severe disease with non-severe disease stratified by study design**

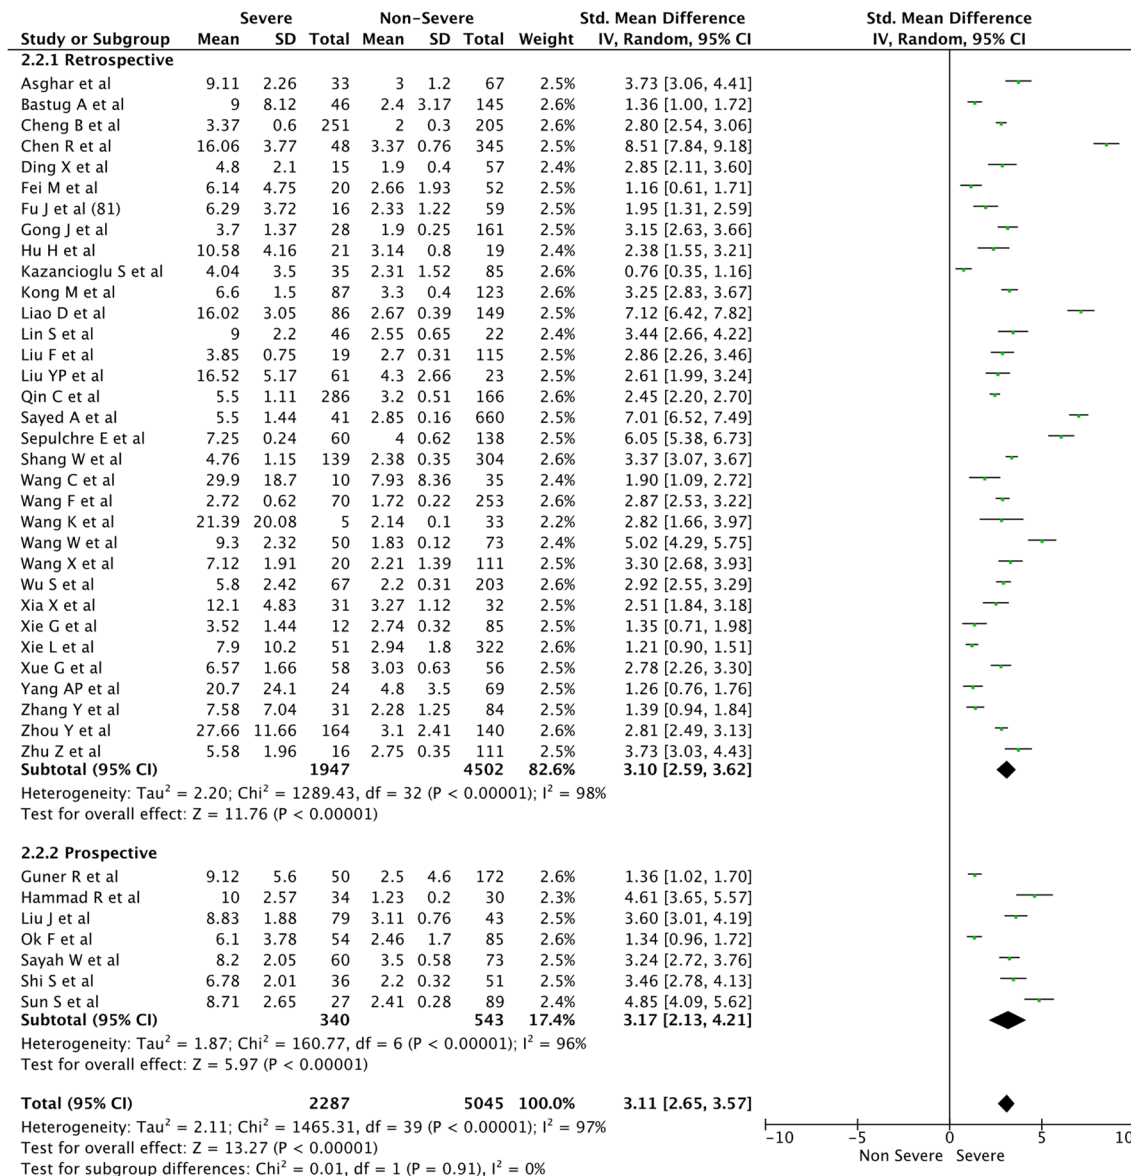

**Figure S12 : Forest plot of studies comparing non-survivors with survivors, stratified by study design**

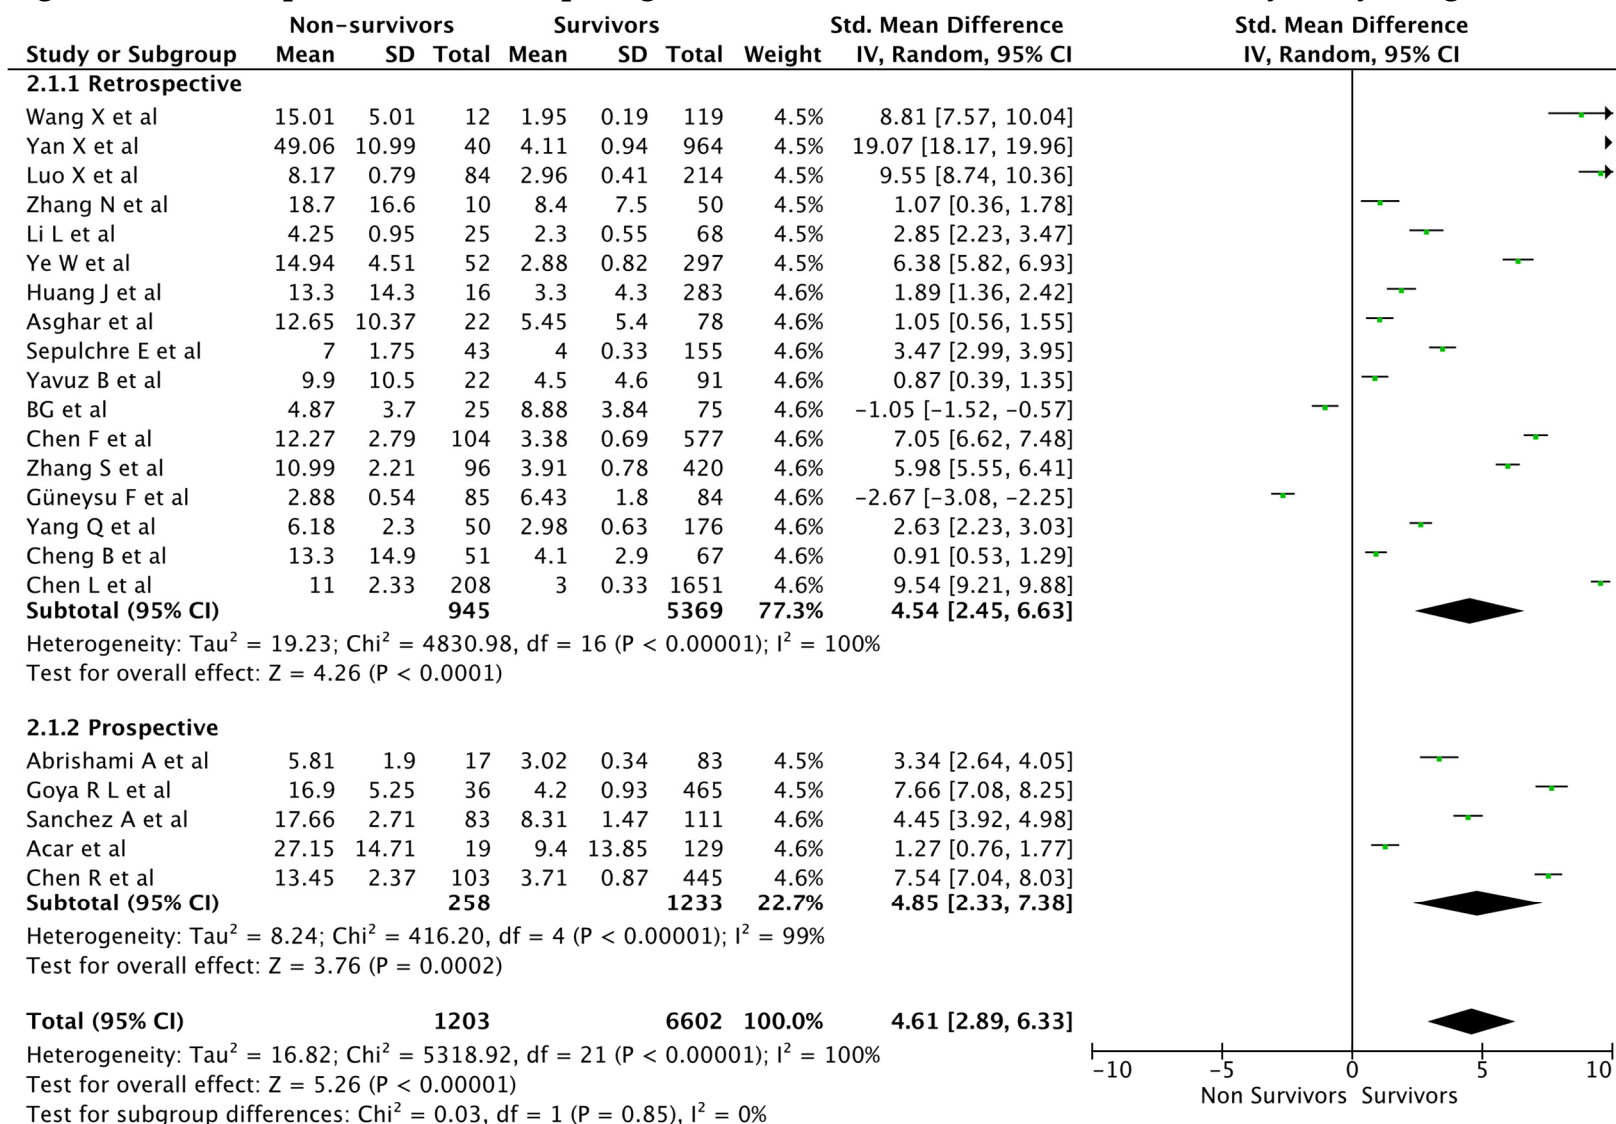

Supplement: s1 [file s1]
